# Supplementary material for: HIV risk and pre-exposure prophylaxis interest among female bar workers in Dar es Salaam: cross-sectional survey
Source: PubMed Central journal article supplement — BMJ Open. 2019 Mar 20;9(3):e023272. doi: 10.1136/bmjopen-2018-023272 (PMC6475445; doi:10.1136/bmjopen-2018-023272), 2019-03-20
Supplement: bmjopen-2018-023272.draft_revisions.pdf [file bmjopen-2018-023272.draft_revisions.pdf]

# BMJ Open

BMJ Open is committed to open peer review. As part of this commitment we make the peer review history of every article we publish publicly available.

When an article is published we post the peer reviewers' comments and the authors' responses online. We also post the versions of the paper that were used during peer review. These are the versions that the peer review comments apply to.

The versions of the paper that follow are the versions that were submitted during the peer review process. They are not the versions of record or the final published versions. They should not be cited or distributed as the published version of this manuscript.

BMJ Open is an open access journal and the full, final, typeset and author-corrected version of record of the manuscript is available on our site with no access controls, subscription charges or pay-per-view fees (<http://bmjopen.bmj.com>).

If you have any questions on BMJ Open's open peer review process please email [editorial.bmjopen@bmj.com](mailto:editorial.bmjopen@bmj.com)

# BMJ Open

## HIV risk and Pre-exposure Prophylaxis interest among female bar workers in Dar es Salaam: a cross-sectional survey

|                               |                                                                                                                                                                                                                                                                                                                                                                                                                                                                                                                                                                                                                                                                                                                                                                                                                                                                                                                                                                                                                                                         |
|-------------------------------|---------------------------------------------------------------------------------------------------------------------------------------------------------------------------------------------------------------------------------------------------------------------------------------------------------------------------------------------------------------------------------------------------------------------------------------------------------------------------------------------------------------------------------------------------------------------------------------------------------------------------------------------------------------------------------------------------------------------------------------------------------------------------------------------------------------------------------------------------------------------------------------------------------------------------------------------------------------------------------------------------------------------------------------------------------|
| Journal:                      | <i>BMJ Open</i>                                                                                                                                                                                                                                                                                                                                                                                                                                                                                                                                                                                                                                                                                                                                                                                                                                                                                                                                                                                                                                         |
| Manuscript ID                 | bmjopen-2018-023272                                                                                                                                                                                                                                                                                                                                                                                                                                                                                                                                                                                                                                                                                                                                                                                                                                                                                                                                                                                                                                     |
| Article Type:                 | Research                                                                                                                                                                                                                                                                                                                                                                                                                                                                                                                                                                                                                                                                                                                                                                                                                                                                                                                                                                                                                                                |
| Date Submitted by the Author: | 02-Apr-2018                                                                                                                                                                                                                                                                                                                                                                                                                                                                                                                                                                                                                                                                                                                                                                                                                                                                                                                                                                                                                                             |
| Complete List of Authors:     | <p>Harling, Guy; Harvard School of Public Health, Department of Global Health and Population<br/> Muya, Aisa; Management and Development for Health<br/> Ortblad, Katrina; Harvard T.H. Chan School of Public Health, Global Health and Population<br/> Mashasi, Irene; Management and Development for Health<br/> Dambach, Peter; UniversitätsKlinikum Heidelberg, Institute of Public Health<br/> Ulenga, Nzovu; Management and Development for Health<br/> Barnhart, Dale; Harvard University T H Chan School of Public Health, Department of Epidemiology<br/> Mboggo, Eric; Management and Development for Health<br/> Oldenburg, Catherine; University of California San Francisco, Francis I Proctor Foundation; University of California San Francisco, Departments of Ophthalmology &amp; Epidemiology and Biostatistics<br/> Bärnighausen, Till ; UniversitätsKlinikum Heidelberg, Institute of Public Health; Africa Health Research Institute<br/> Spiegelman, Donna; Harvard School of Public Health, Epidemiology &amp; Biostatistics</p> |
| Keywords:                     | Female bar workers, Barmaids, Tanzania, Pre-exposure prophylaxis, HIV prevention                                                                                                                                                                                                                                                                                                                                                                                                                                                                                                                                                                                                                                                                                                                                                                                                                                                                                                                                                                        |
|                               |                                                                                                                                                                                                                                                                                                                                                                                                                                                                                                                                                                                                                                                                                                                                                                                                                                                                                                                                                                                                                                                         |

SCHOLARONE™  
Manuscripts

1  
2  
3 **Title:** HIV risk and Pre-exposure Prophylaxis interest among female bar workers in Dar es Salaam:  
4  
5 a cross-sectional survey  
6  
7

8 **Running Head:** HIV risk and PrEP interest in Dar es Salaam barmaids  
9

10  
11 **Authors:** Guy Harling<sup>1,2</sup>, Aisa Muya<sup>3</sup>, Katrina F. Ortblad<sup>4</sup>, Irene Mashasi<sup>3</sup>, Peter Dambach<sup>5</sup>, Nzovu  
12  
13 Ulenga<sup>3</sup>, Dale Barnhart<sup>2</sup>, Eric Mboggo<sup>3</sup>, Catherine E. Oldenburg<sup>6,7,8</sup>, Till W. Bärnighausen<sup>4,5,9</sup>, Donna  
14  
15 Spiegelman<sup>2,4,10</sup>  
16  
17

18  
19 **Author affiliations:**  
20

- 21 1. Institute for Global Health, University College London, London, UK
- 22 2. Department of Epidemiology, Harvard T.H. Chan School of Public Health, Boston, MA
- 23 3. Management and Development for Health, Dar es Salaam, Tanzania
- 24 4. Department of Global Health and Population, Harvard T.H. Chan School of Public Health,  
25 Boston, MA
- 26 5. Institute of Public Health, University of Heidelberg, Heidelberg, Germany
- 27 6. Francis I. Proctor Foundation, University of California, San Francisco, CA
- 28 7. Department of Ophthalmology, University of California, San Francisco, CA
- 29 8. Department of Epidemiology and Biostatistics, University of California, San Francisco, CA
- 30 9. Africa Health Research Institute, KwaZulu-Natal, South Africa
- 31 10. Departments of Biostatistics and Nutrition, Harvard T.H. Chan School of Public Health,  
32 Boston, MA

33  
34 **Address for correspondence:** Guy Harling. Institute for Global Health, University College London,  
35  
36 Mortimer Market Centre, London, WC1E 6JB. [g.harling@ucl.ac.uk](mailto:g.harling@ucl.ac.uk)  
37  
38  
39  
40  
41  
42  
43  
44

## ABSTRACT

**Objective:** Female bar workers (FBW) in East Africa often conduct sex work to supplement their incomes, and may be vulnerable to HIV acquisition. Pre-exposure prophylaxis (PrEP) offers protection against HIV acquisition. However, there is little research on FBW's sexual health. Our objective was to determine HIV risk behaviors and interest in PrEP among FBW in the largest city in East Africa.

**Design:** Cross-sectional survey covering respondents' work and personal lives, including social and behavioral risk factors for HIV. Those who did not report being HIV-positive were asked about their knowledge of and interest in PrEP. All women were offered free on-site HIV testing and counselling (HTC).

**Setting:** Eight randomly selected workplaces, i.e. bars, in Kinondoni district, Dar es Salaam (DSM).

**Participants:** 66 FBW ( $\geq 18$  years) selected at random from all women working in selected bars on the day of visit.

**Results:** Half of respondents reported having had sex for money: 20% with bar clients only, 15% with other men only and 15% with both. Almost all (98%) reported  $\geq 1$  non-commercial partners in the past 12 months; only 30% reported using condoms with these partners. 85% of respondents had ever been pregnant; 44% had had an unintended pregnancy. Only 5% of respondents had ever heard of PrEP. However, 54% were somewhat/very interested in daily-pill PrEP and 79% were somewhat/very interested in LAI PrEP. When asked to rank modalities, LAI PrEP was the most-preferred. Seven percent of the 56 respondents who completed HTC were HIV-positive.

1  
2  
3 **Conclusions:** FBW in DSM have elevated risk factors for HIV acquisition, and PrEP appears highly  
4 acceptable. Studies assessing PrEP initiation and adherence in FBW appear warranted.  
5  
6  
7  
8  
9  
10

11 **Keywords:** Female bar workers; Barmaids; Tanzania; Pre-exposure prophylaxis; HIV prevention  
12  
13  
14  
15  
16  
17  
18  
19  
20  
21  
22  
23  
24  
25  
26  
27  
28  
29  
30  
31  
32  
33  
34  
35  
36  
37  
38  
39  
40  
41  
42  
43  
44  
45  
46  
47  
48  
49  
50  
51  
52  
53  
54  
55  
56  
57  
58  
59  
60

For peer review only

## STRENGTHS AND LIMITATIONS OF THIS STUDY

- This study is the first to evaluate biological HIV status and interest in pre-exposure prophylaxis (PrEP) in bar workers in Dar es Salaam.
- The study population was selected at random from among all female bar workers in one of the three districts of the city.
- The sample is relatively small, potentially limiting power to see significant differences within subgroups.
- The sensitive nature of many of the HIV risk factors considered, and the self-report methods employed by the survey, may have led to underreporting of risk behaviours.
- It is unclear how far the findings of this work can be generalized geographically.

## INTRODUCTION

Female sex workers (FSW), i.e. women who receive money or other goods in exchange for sexual services, are a key population for the HIV epidemic in sub-Saharan Africa (SSA). These women are at especially high risk of acquiring and transmitting HIV and other sexually transmitted infections (STI).<sup>1</sup> There is substantial research on how sex workers (SW) contribute to,<sup>2</sup> and are impacted by,<sup>3</sup> the HIV epidemic in SSA.

SW are sometimes divided into 'direct' SW for whom it is a primary profession, and 'indirect' SW, for whom it is a supplementary source of income.<sup>4</sup> Indirect SW may be particularly important for HIV epidemics if they do not self-identify as SW, and thus are not reached by or do not access HIV prevention services such as those targeting direct FSW. In East Africa, female bar workers (FBW), women who either sell or deliver drinks to customers in commercial establishments, often act as indirect FSW. FBW, or barmaids, often do not self-identify as FSW,<sup>5 6</sup> and, in contrast to bar-based direct FSW, are employed by bars to provide non-sexual services. However, past quantitative research has shown that a substantial minority of FBW (35-45%) have sex in return for money, often with bar clients.<sup>7 8</sup> FBW are often stigmatized and considered by others to be FSW.<sup>9 10</sup> Qualitative work suggests FBW have limited ability to protect themselves against STIs and other adverse consequences of sex work, notably when negotiating condom use.<sup>11-13</sup>

Pre-exposure prophylaxis (PrEP) is an important HIV prevention tool, proven to substantially prevent HIV acquisition when taken as prescribed.<sup>14 15</sup> There are several planned and ongoing PrEP demonstration projects in Africa.<sup>16 17</sup> However, previous PrEP studies have found variable adherence in both general<sup>18</sup> and FSW populations.<sup>19 20</sup> Most published PrEP studies have focused on daily pill-based PrEP, although one study showed effectiveness for on-demand pills among

1  
2  
3 men-who-have-sex-with-men (MSM).<sup>21</sup> However, other prevention modalities have been  
4  
5 considered, including long-acting injectables,<sup>22 23</sup> vaginal gels <sup>24</sup> and vaginal rings.<sup>25</sup>  
6  
7

8  
9 The World Health Organization recommends PrEP for populations with an annual risk of HIV  
10  
11 acquisition greater than 3%,<sup>26</sup> and as such it is likely to be a key intervention for reducing HIV  
12  
13 among FSW internationally.<sup>27</sup> Several countries in Africa with generalized epidemics have  
14  
15 included FSW among the key populations eligible for PrEP, <sup>28-30</sup> but few if any had begun  
16  
17 widespread implementation for FSW by mid-2017. Past research has shown high acceptability of  
18  
19 daily-pill PrEP amongst FSW hypothetically in a range of settings,<sup>31</sup> and in practice in Kenya.<sup>32</sup>  
20  
21  
22

23  
24 Although many FBW also act as SW, there is limited evidence on how much risky sexual behaviour  
25  
26 FBW engage in. To our knowledge, there is no research on the acceptability of PrEP amongst FBW.  
27  
28 We therefore conducted a study to determine HIV prevalence, HIV-related risk factors, and initial  
29  
30 interest in and acceptability of PrEP amongst FBW in Dar es Salaam municipality (DSM), Tanzania,  
31  
32 the largest city in eastern Africa.  
33  
34  
35  
36  
37  
38

## 39 **METHODS**

40  
41  
42 We conducted a cross-sectional study using a two-stage sampling method in January 2017. We  
43  
44 first randomly selected eight bars from a paper listing of all licensed premises in Kinondoni  
45  
46 district, DSM (one of three in the municipality). We repeatedly sampled without replacement first  
47  
48 a page number and then line number from the listing. The field team visited each bar at a time  
49  
50 arranged by telephone with each bar's licensee. After explaining the study first to the bar manager  
51  
52 and then to all FBW present, FBW were invited to participate in a computer-assisted personal  
53  
54  
55  
56  
57  
58  
59  
60



1  
2  
3 interview (CAPI), and then complete HIV testing and counselling (HTC). Study inclusion criteria  
4 were being 18 years or older and working as a FBW at the time of study visit. Between 6 and 12  
5  
6  
7  
8 FBW – depending on the length of each interview – were chosen at random within each bar based  
9  
10 on a list drawn up by the bar manager at first bar entry. All interviews were conducted in a three-  
11  
12 wheel taxi (*bajaji*) with closed sides parked close to the bar, to ensure privacy.  
13

14  
15 The CAPI covered several topics, including: women’s socio-demographics; their work history;  
16  
17 their sexual history, including past STI diagnoses and HIV testing; their knowledge of HIV  
18  
19 prevention modalities; substance use; and psychological wellbeing (PHQ-9 depression scale, 4-  
20  
21 item PTSD screen, generalized social support scale). Respondents were asked if they had ever  
22  
23 heard of PrEP or a daily pill to prevent HIV infection. They were then asked how interested they  
24  
25 were in taking PrEP as: (i) a daily pill; (ii) an injection every 3 months; (iii) a pericoital vaginal gel;  
26  
27 (iv) a monthly vaginal ring. Finally, they were asked to rank the four modalities from most to least  
28  
29 preferred. Questions about PrEP were not asked to those who self-reported having previously  
30  
31 tested HIV-positive, and due to a coding error were not asked at the first bar visited. Anyone  
32  
33 testing positive for HIV and not already linked to care was referred to their clinic of choice.  
34  
35  
36  
37  
38  
39

40 In this analysis, we provide descriptive statistics for various potential risk and protective factors  
41  
42 for HIV acquisition. We then assess bivariate associations between these factors and interest in  
43  
44 various modalities of PrEP, using  $\chi^2$  tests for binary variables and Kruskal-Wallis tests for  
45  
46 continuous and ordinal variables. The study received ethical approval from Harvard T.H. Chan  
47  
48 School of Public Health and the Tanzanian National Institute for Medical Research. Written  
49  
50 informed consent was obtained from each participant.  
51  
52  
53  
54  
55  
56  
57  
58  
59  
60

## Participant and Public Involvement

Neither patients nor public were directly involved in the development, design or recruitment of the study. HIV test results were provided to participants at point of testing; results will not otherwise be disseminated directly to study participants.

## RESULTS

### Participant characteristics

Sixty-six FBW were invited to participate in the study and all agreed (Table 1). Most of the women were in their twenties (median age 26, interquartile range [IQR]: 23-30). Almost all the women (91%) were born outside of DSM. FBW had been working as barmaids for a median of two years (IQR: 4 months to 4 years). Only 9% FBW planned to continue working as FBW, all but one of whom planned to stop within two years. FBW reported a median monthly income of \$91 (IQR: \$68-136). Most FBW (85%) had been pregnant in the past, 44% reported having had an unintended pregnancy and 39% a miscarriage or termination. 71% of FBW had a living child at the time of interview (median 1, IQR: 1-2). 96% of FBW had previously taken an HIV test (median 3 tests in lifetime, IQR: 2-5), with 53% having tested within the past six months and 78% within the past 12. Three women (5%) had previously tested positive for HIV. Fifty-six FBW (85%) consented to test for HIV and four of these (7%) tested positive; only one had not previously received a positive test result.

### HIV acquisition risk factors

Exactly half of FBW reported ever having had sex with someone in return for money: 20% only with bar clients; 15% only with other men; and 15% with both. Of the 35% FBW reporting sex with bar clients, 74% reported asking clients to use condoms often or always. A majority (52%) reported that clients sometimes or often asked not to use condoms, but only 8% of FBW reported often or always agreeing not to use condoms in situations where they want to use a condom but their clients has asked not to. FBW also reported a median of two non-commercial partners in the past 12 months (IQR: 1-3, maximum 8). 68% of FBW reported having a primary partner, and only 18% of these women reported using a condom at last sex with this partner. Only 30% of FBW reported using male or female condoms as a family planning method, while another 24% reported using pills, injectables or implants.

### PrEP interest

Questions about PrEP were asked to 56 women (3 had previously tested HIV positive, 7 were in the first bar visited). Only 5% of these FBW had ever heard of PrEP, however 54% were either somewhat or very interested in a daily pill that protected against HIV infection, and only 16% were uninterested (Figure 1A). When asked about other potential treatment modalities, 79% of FBW were interested in long-acting injectable PrEP, 38% in vaginal gel PrEP and only 11% in monthly vaginal ring PrEP. Only one women was somewhat or very uninterested in any type of PrEP. Level of interest in daily-pill PrEP was significantly correlated with interest in long-acting injectable PrEP ( $\rho = 0.40$ ,  $p=0.003$ ), but not with either vaginal modality. When asked to rank the four modalities, the most preferred method was long-acting injectable PrEP, although 82% of women ranked daily-pill PrEP as either their first or second preference (Figure 1B). Restricting

1  
2  
3 our sample to all respondents with at least 'neutral' (96%) or at least 'somewhat interested'  
4  
5 (86%) responses for at least one PrEP modality did not change these patterns.  
6  
7

## 8 **Predictors of PrEP interest**

9

10  
11 Associations between interest in each PrEP modality and the range of HIV risk factors are  
12 presented in Table 2. There was no significant difference in interest level (very/somewhat  
13 interested vs. neutral or somewhat/very uninterested) in daily-pill PrEP for those who did/did  
14 not report any sex for money (60% vs. 46%,  $p=0.30$ ), or for those who did/did not report sex for  
15 money with bar clients (61% vs 49%,  $p=0.33$ ). Interest in long-acting injectable PrEP was  
16 similarly unassociated with having had sex in return for money (any sex for money: 80% vs 77%,  
17  $p=0.78$ ; sex for money with bar clients: 86% vs. 74%,  $p=0.31$ ). The only socio-demographic or  
18 behavioral factor associated with significantly higher interest in daily-pill PrEP was a history of  
19 miscarriage or termination (61% vs. 39%,  $p=0.04$ ), and the only factor associated with  
20 significantly higher interest in long-acting injectable PrEP was number of non-client partners in  
21 the past 12 months (interest: median 2, IQR: 1-3; no interest: median 1, IQR: 1-1;  $p=0.03$ ).  
22  
23 Willingness to consent for an HIV test was not associated with interest in daily-pill PrEP (54% vs  
24 50%,  $p=0.83$ ).  
25  
26  
27  
28  
29  
30  
31  
32  
33  
34  
35  
36  
37  
38  
39  
40  
41  
42  
43  
44  
45

## 46 **DISCUSSION**

47

48  
49 In a random sample of 66 FBW from bars in DSM, HIV prevalence was low (similar to the 7%  
50 prevalence for 25-29 year old women nationally, and 8% for 15-49 year old women in DSM, in  
51 2011-12, the most-recent nationally representative survey<sup>33</sup>). However risk factors for HIV  
52  
53  
54  
55  
56  
57  
58  
59  
60

1  
2  
3 acquisition were substantial – including multiple partners, moderate to low condom use, and  
4  
5 substantial levels of sex for money. The proportion of FBW reporting sex for money was similar to  
6  
7 earlier quantitative studies.<sup>7 8</sup>  
8  
9

10  
11 Awareness of PrEP for HIV prevention was very low but interest in PrEP, particularly for daily  
12  
13 pills and long-acting injectables, was high. Both these modalities are likely to be recognizable to  
14  
15 women in Tanzania since family planning options have similar modes of delivery, e.g. daily  
16  
17 contraceptive pills, injectable Depo-Provera and implanted Nur-Isterate. Greater interest in long-  
18  
19 acting injectables may also reflect the difficulties of taking daily pills for these working women,  
20  
21 and of applying gels prior to sex when timing of sex acts is unpredictable and sometimes not  
22  
23 chosen by them. While no PrEP is currently available to Tanzanian women, daily-pill PrEP  
24  
25 demonstration trials will begin in key Tanzanian populations in 2018 and long-acting injectable  
26  
27 PrEP has reached phase-III trials elsewhere through HPTN-084.<sup>34</sup>  
28  
29  
30  
31  
32

### 33 **Strengths and limitations**

34  
35

36 This study provides a first insight into the HIV serostatus and PrEP interest of FBW in DSM. While  
37  
38 the sample in this study is small, it was a random sample drawn from a full enumeration of all  
39  
40 licensed premises (n>2500) in Kinondoni district, an area with a population of over 1,750,000  
41  
42 inhabitants in 2012,<sup>35</sup> and then a full enumeration of all FBW working in each bar at the time of  
43  
44 first visit. Nevertheless, it is possible that the sample of women drawn differs on some  
45  
46 characteristics from other FBW in Kinondoni. Caution is needed in generalizing beyond Kinondoni  
47  
48 to the rest of DSM, as well as to other areas of Tanzania and East Africa. However, even should the  
49  
50 results only be applicable within Kinondoni or DSM, our results suggest that a very large number  
51  
52 of FBWs in this region are at risk of HIV acquisition and local interventions may be warranted.  
53  
54  
55  
56  
57  
58  
59  
60

1  
2  
3 Additionally, since many of the questions asked were sensitive ones, and the responses self-  
4 reported through face-to-face interviews, FBW may have underreported some risk behaviours.  
5  
6 The potential for social desirability bias to affect questions about PrEP was lessened by the very  
7  
8 low baseline awareness of this HIV prevention option.  
9  
10  
11  
12  
13  
14  
15

## 16 **CONCLUSIONS**

17  
18  
19 Based on these data, FBW appear to be a key population for HIV prevention efforts, both to protect  
20 themselves and their partners. PrEP seems acceptable to FBW in DSM, and this study also showed  
21 the feasibility of contacting FBW at their workplaces. Nevertheless, further information is needed  
22 on the feasibility of delivering PrEP and supporting HIV-related health services in this population.  
23  
24  
25  
26  
27  
28  
29 Studies assessing PrEP initiation and adherence among FBW appear warranted.  
30  
31  
32  
33  
34  
35  
36  
37  
38  
39  
40  
41  
42  
43  
44  
45  
46  
47  
48  
49  
50  
51  
52  
53  
54  
55  
56  
57  
58  
59  
60

**REFERENCES**

1. Baral S, Beyrer C, Muessig K, Poteat T, Wirtz AL, Decker MR, et al. Burden of HIV among female sex workers in low-income and middle-income countries: a systematic review and meta-analysis. *Lancet Infect. Dis.* 2012;12(7):538-49.
2. Gouws E, Cuchi P. Focusing the HIV response through estimating the major modes of HIV transmission: a multi-country analysis. *Sex. Transm. Infect.* 2012;88(Suppl 2):i76-i85.
3. Shannon K, Strathdee SA, Goldenberg SM, Duff P, Mwangi P, Rusakova M, et al. Global epidemiology of HIV among female sex workers: influence of structural determinants. *Lancet* 2015;385(9962):55-71.
4. Harcourt C, Donovan B. The many faces of sex work. *Sex. Transm. Infect.* 2005;81(3):201-06.
5. Sori AT. Poverty, sexual experience and HIV vulnerability risks: evidence from Addis Ababa, Ethiopia. *J. Biosoc. Sci.* 2012;44(6):677-701.
6. Rosenheck R, Ngilangwa D, Manongi R, Kapiga S. Treatment-seeking behavior for sexually transmitted infections in a high-risk population. *AIDS Care* 2010;22(11):1350-58.
7. Ao TT, Sam NE, Masenga EJ, Seage III GR, Kapiga SH. Human immunodeficiency virus type 1 among bar and hotel workers in northern Tanzania: the role of alcohol, sexual behavior, and herpes simplex virus type 2. *Sex. Transm. Dis.* 2006;33(3):163-69.
8. Riedner G, Rusizoka M, Hoffmann O, Nichombe F, Lyamuya E, Mmbando D, et al. Baseline survey of sexually transmitted infections in a cohort of female bar workers in Mbeya Region, Tanzania. *Sex. Transm. Infect.* 2003;79(5):382-87.
9. van Blerk L. Negotiating boundaries: the sex work identities of 'bar girls' in Nazareth, Ethiopia. *Gender, Place and Culture* 2011;18(02):217-33.
10. Kerrigan D, Mbwambo J, Likindikoki S, Beckham S, Mwampashi A, Shembilu C, et al. Project Shikamana: Baseline Findings From a Community Empowerment-Based Combination HIV

- 1  
2  
3 Prevention Trial Among Female Sex Workers in Iringa, Tanzania. *J. Acquir. Immune Defic.*  
4 *Syndr.* 2017;74(Suppl 1):S60.  
5  
6  
7  
8 11. Beckham S. " Like Any Other Woman"? Pregnancy, Motherhood, and HIV among Sex Workers  
9 in Southern Tanzania. Johns Hopkins University, 2013.  
10  
11  
12 12. Talle A. Bar workers at the border. In: Klepp K-I, Biswalo PM, Talle A, editors. *Young people at*  
13 *risk: fighting AIDS in northern Tanzania.* Oslo, Norway: Scandinavian University Press,  
14 1995:18-30.  
15  
16  
17  
18 13. Van Blerk L. Poverty, migration and sex work: youth transitions in Ethiopia. *Area*  
19 2008;40(2):245-53.  
20  
21  
22  
23 14. Baeten JM, Donnell D, Ndase P, Mugo NR, Campbell JD, Wangisi J, et al. Antiretroviral  
24 prophylaxis for HIV prevention in heterosexual men and women. *N. Engl. J. Med.*  
25 2012;367(5):399-410.  
26  
27  
28  
29 15. Thigpen MC, Kebaabetswe PM, Paxton LA, Smith DK, Rose CE, Segolodi TM, et al. Antiretroviral  
30 preexposure prophylaxis for heterosexual HIV transmission in Botswana. *N. Engl. J. Med.*  
31 2012;367(5):423-34.  
32  
33  
34  
35 16. AVAC. *HIV Prevention Research & Development Database*. <http://www.avac.org/pxrd>. (accessed  
36 22 August 2017).  
37  
38  
39  
40 17. Cowan F, Delany-Moretlwe S, Sanders EJ, Mugo NR, Guedou FA, Alary M, et al. PrEP  
41 implementation research in Africa: what is new? *J. Int. AIDS Soc.* 2016;19(Suppl 6):21101.  
42  
43  
44  
45 18. Van der Straten A, Van Damme L, Haberer JE, Bangsberg DR. Unraveling the divergent results  
46 of pre-exposure prophylaxis trials for HIV prevention. *AIDS* 2012;26(7):F13-F19.  
47  
48  
49 19. Eakle R, Gomez GB, Mbogua J, Bothma R, Naicker N, Moorhouse M, et al. Treatment And  
50 Prevention for Female Sex Workers in South Africa: First-year Results for the TAPS  
51 Demonstration Project. *HIV Research for Prevention.* Chicago, IL, 2016.  
52  
53  
54  
55  
56  
57  
58  
59  
60



- 1  
2  
3 20. Kyongo J, Kiragu M, Nduta S, Karuga R, Mulwa R, Mwimali P, et al. Oral PrEP for HIV  
4 Prevention: Early Lessons from a PrEP Demonstration Project in Kenya. *HIV Research for*  
5 *Prevention*. Chicago, IL, 2016.  
6  
7  
8  
9 21. Molina J-M, Capitant C, Spire B, Pialoux G, Cotte L, Charreau I, et al. On-demand preexposure  
10 prophylaxis in men at high risk for HIV-1 infection. *N. Engl. J. Med.* 2015;373(23):2237-46.  
11  
12  
13 22. Landovitz RJ, Kofron R, McCauley M. The Promise and Pitfalls of Long Acting Injectable Agents  
14 for HIV Prevention. *Curr. Opin. HIV AIDS* 2016;11(1):122.  
15  
16  
17 23. Margolis DA, Gonzalez-Garcia J, Stellbrink H-J, Eron JJ, Yazdanpanah Y, Podzamczar D, et al.  
18 Long-acting intramuscular cabotegravir and rilpivirine in adults with HIV-1 infection  
19 (LATTE-2): 96-week results of a randomised, open-label, phase 2b, non-inferiority trial.  
20 *Lancet* 2017.  
21  
22  
23 24. Karim QA, Karim SSA, Frohlich JA, Grobler AC, Baxter C, Mansoor LE, et al. Effectiveness and  
24 safety of tenofovir gel, an antiretroviral microbicide, for the prevention of HIV infection in  
25 women. *Science* 2010;329(5996):1168-74.  
26  
27  
28 25. Baeten JM, Palanee-Phillips T, Brown ER, Schwartz K, Soto-Torres LE, Govender V, et al. Use of  
29 a vaginal ring containing dapivirine for HIV-1 prevention in women. *N. Engl. J. Med.*  
30 2016;375(22):2121-32.  
31  
32  
33 26. World Health Organization. *Consolidated guidelines on the use of antiretroviral drugs for*  
34 *treating and preventing HIV infection: recommendations for a public health approach*. Geneva:  
35 World Health Organization, 2016.  
36  
37  
38 27. Beyrer C, Crago A-L, Bekker L-G, Butler J, Shannon K, Kerrigan D, et al. An action agenda for  
39 HIV and sex workers. *Lancet* 2015;385(9964):287-301.  
40  
41  
42 28. South African National AIDS Council (SANAC). *The South African National Sex Worker HIV Plan*  
43 2016-2019. Pretoria, South Africa: SANAC, 2016.  
44  
45  
46  
47  
48  
49  
50  
51  
52  
53  
54  
55  
56  
57  
58  
59  
60

- 1  
2  
3 29. National AIDS & STI Control Programme (NASCOP). Framework for the Implementation of Pre-  
4 exposure Prophylaxis of HIV in Kenya. Nairobi, Kenya: NASCOP, 2017.  
5  
6  
7  
8 30. Botswana Ministry of Health. Handbook of the Botswana 2016 integrated HIV clinical care  
9 guidelines. Gabarone, Botswana: Botswana Ministry of Health, 2016.  
10  
11  
12 31. Koechlin FM, Fonner VA, Dalglish SL, O'Reilly KR, Baggaley R, Grant RM, et al. Values and  
13 preferences on the use of oral pre-exposure prophylaxis (PrEP) for HIV prevention among  
14 multiple populations: a systematic review of the literature. *AIDS Behav.* 2017;21(5):1325-35.  
15  
16  
17  
18 32. Van der Elst EM, Mbogua J, Operario D, Mutua G, Kuo C, Mugo P, et al. High acceptability of HIV  
19 pre-exposure prophylaxis but challenges in adherence and use: qualitative insights from a  
20 phase I trial of intermittent and daily PrEP in at-risk populations in Kenya. *AIDS Behav.*  
21 2013;17(6):2162-72.  
22  
23  
24  
25  
26 33. Tanzania Commission for AIDS (TACAIDS), Zanzibar AIDS Commission (ZAC), National Bureau  
27 of Statistics (NBS), Office of the Chief Government Statistician (OCGS), ICF International.  
28 Tanzania HIV/AIDS and Malaria Indicator Survey 2011-12. Dar es Salaam, Tanzania:  
29 TACAIDS, ZAC, NBS, OCGS, and ICF International, 2013.  
30  
31  
32  
33  
34 34. *NIH Launches First Large Trial of a Long-Acting Injectable Drug for HIV Prevention: Study to*  
35 *Test Efficacy, Safety of Injectable Cabotegravir Compared to Daily Oral*  
36 *PrEP.* [https://www.niaid.nih.gov/news-events/nih-launches-first-large-trial-long-acting-](https://www.niaid.nih.gov/news-events/nih-launches-first-large-trial-long-acting-injectable-drug-hiv-prevention)  
37 [injectable-drug-hiv-prevention.](https://www.niaid.nih.gov/news-events/nih-launches-first-large-trial-long-acting-injectable-drug-hiv-prevention) (accessed 4 September 2017).  
38  
39  
40  
41  
42  
43 35. National Bureau of Statistics, Office of Chief Government Statistician. 2012 Population and  
44 Housing Census: Population Distribution by Administrative Areas. Dar es Salaam: National  
45 Bureau of Statistics, 2013.  
46  
47  
48  
49  
50  
51  
52  
53  
54  
55  
56  
57  
58  
59  
60

1  
2  
3 **Contributors:** DS and TWB conceptualized the study. GH conducted the analyses, summarized the  
4 results in tables and figures and wrote the first draft of the paper. All authors contributed to the  
5 study design, data interpretation and revisions to the text, and approved the final text  
6  
7

8  
9 **Acknowledgements:** We thank the Kinondoni District Medical Officer, bar owners, bar managers  
10 and barmaids for their assistance conducting this study.  
11  
12

13 **Funding:** This study was supported by the National Institute on Aging (grant R01-AI112339). KFO  
14 was supported in part by the National Institute of Allergy and Infectious Disease T32-AI007535  
15 (PI Seage). CEO was supported in part by the National Institute on Drug Abuse T32-DA013911 (PI  
16 Flanagan) and the National Institute of Mental Health R25-MH083620 (PI Nunn). TB was  
17 supported by the Alexander von Humboldt Foundation through the Alexander von Humboldt  
18 professor award, which is funded by the German Federal Ministry of Education and Research; the  
19 Wellcome Trust; the European Commission; the Clinton Health Access Initiative; and the National  
20 Institutes of Health through the National Institute of Child Health and Human Development (R01-  
21 HD084233), the National Institute on Aging (P01-AG041710), the National Institute of Allergy and  
22 Infectious Diseases (R01-AI124389) and the Fogarty International Center (D43-TW009775).  
23  
24  
25  
26  
27  
28  
29  
30  
31

32 **Disclaimer:** The funders had no role in study design, data collection and analysis, decision to  
33 publish, or preparation of the manuscript.  
34  
35

36 **Patient consent:** Written informed consent was obtained from all individual participants  
37 included in the study.  
38  
39

40 **Competing interests:** None declared  
41  
42

43 **Data sharing statement:** All unpublished data related to this research project are available with  
44 the authors and can be requested by emailing to [g.harling@ucl.ac.uk](mailto:g.harling@ucl.ac.uk).  
45  
46  
47  
48  
49  
50  
51  
52  
53  
54  
55  
56  
57  
58  
59  
60

## FIGURES AND TABLES

**Table 1: Descriptive statistics for socio-demographic and behavioral risk factors for HIV**

|                                                       | All respondents |               | PrEP question respondents |             |
|-------------------------------------------------------|-----------------|---------------|---------------------------|-------------|
|                                                       | N               |               | N                         |             |
| Age                                                   | 66              | 26 [23 - 30]  | 56                        | 25 [23-29]  |
| Born in Dar es Salaam                                 | 65              | 9%            | 55                        | 9%          |
| Years working in bars                                 | 66              | 2 [0.4 - 4]   | 56                        | 1.8 [0.4-3] |
| Plan to continue bar work                             | 66              | 11%           | 56                        | 9%          |
| Monthly income (USD)                                  | 62              | 91 [68 - 136] | 53                        | 91 [68-136] |
| Ever been pregnant                                    | 66              | 85%           | 56                        | 82%         |
| Of whom, ever had undesired pregnancy                 | 56              | 52%           | 46                        | 54%         |
| Of whom, ever had termination or miscarriage          | 56              | 46%           | 46                        | 46%         |
| Ever had sex with anyone for money                    | 66              | 50%           | 56                        | 54%         |
| Ever had sex with patron for money                    | 66              | 35%           | 56                        | 38%         |
| Of whom, ever had oral sex with patron                | 23              | 70%           | 21                        | 30%         |
| Of whom, Ever had vaginal sex with patron             | 23              | 48%           | 21                        | 67%         |
| Of whom, How often asks patron to use condom †        | 23              | 4 [3 - 4]     | 21                        | 4 [4-4]     |
| Of whom, How often patron asks not to use condom †    | 23              | 2 [1 - 3]     | 21                        | 3 [2-3]     |
| Ever had sex with others for money                    | 66              | 30%           | 21                        | 48%         |
| Number of non-client partners in past 12m             | 56              | 2 [1 - 3]     | 47                        | 1 [1-3]     |
| Has a primary partner                                 | 66              | 68%           | 56                        | 66%         |
| Of whom, used condom at last sex with primary partner | 44              | 18%           | 37                        | 19%         |
| Currently using male condoms for family planning      | 66              | 36%           | 56                        | 38%         |
| Ever taken an HIV test                                | 66              | 97%           | 56                        | 96%         |
| Number of HIV tests ever taken                        | 64              | 3 [2 - 5]     | 54                        | 3 [2-5]     |
| Months since last HIV test                            | 64              | 6 [3.5 - 12]  | 54                        | 6 [4-12]    |
| Willing to complete HCT today                         | 66              | 85%           | 56                        | 86%         |

Values are counts (N), proportions or medians and interquartile ranges. USD: United States dollar; HCT: HIV counselling and testing. † 5-point scale; higher values indicate greater frequency.

**Table 2: Associations between socio-demographic and behavioral factors and interest in PrEP modalities**

|                                                       | Daily pill  |             | 90-day injectable |                | Vaginal gel  |             | Vaginal ring |            |
|-------------------------------------------------------|-------------|-------------|-------------------|----------------|--------------|-------------|--------------|------------|
|                                                       | No          | Yes         | No                | Yes            | No           | Yes         | No           | Yes        |
| Very/somewhat interested in modality                  | 30          | 26          | 12                | 44             | 35           | 21          | 50           | 6          |
| Age                                                   | 25 [23-30]  | 25 [23-28]  | 23 [22-28.5]      | 25 [23-29]     | 25 [22-28]   | 25 [23-30]  | 25 [22-29]   | 27 [24-27] |
| Born in Dar es Salaam                                 | 8%          | 10%         | 8%                | 9%             | 9%           | 10%         | 8%           | 17%        |
| Years working in bars                                 | 1.8 [0.4-3] | 1.8 [0.3-3] | 1.5 [0.2-2.5]     | 1.8 [0.5-3]    | 1.5 [0.5-3]  | 2 [0.25-6]  | 1.5 [0.4-3]  | 2 [2-3]    |
| Plan to continue bar work                             | 8%          | 11%         | 8%                | 10%            | 9%           | 10%         | 11%          | 0%         |
| Monthly income (USD)                                  | 91 [68-136] | 91 [57-148] | 91 [68-136]       | 91 [68-159]    | 102 [80-136] | 91 [55-182] | 91 [68-159]  | 91 [91-91] |
| Ever been pregnant                                    | 88%         | 77%         | 83%               | 82%            | 80%          | 86%         | 82%          | 83%        |
| Of whom, ever had undesired pregnancy                 | 48%         | 61%         | 50%               | 56%            | 64%          | 39%         | 56%          | 40%        |
| Of whom, ever had termination or miscarriage          | <b>30%</b>  | <b>61%</b>  | 40%               | 47%            | 46%          | 44%         | 46%          | 40%        |
| Ever had sex with anyone for money                    | 46%         | 60%         | 50%               | 55%            | 54%          | 52%         | 56%          | 33%        |
| Ever had sex with patron for money                    | 31%         | 43%         | 25%               | 41%            | 40%          | 33%         | 38%          | 33%        |
| Of whom, ever had oral sex with patron                | 27%         | 33%         | 33%               | 30%            | 31%          | 29%         | 34%          | 0%         |
| Of whom, Ever had vaginal sex with patron             | 75%         | 62%         | 100%              | 61%            | 64%          | 71%         | 63%          | 100%       |
| Of whom, How often asks patron to use condom †        | 4 [4-4]     | 4 [3-4]     | 4 [4-4]           | 4 [3-4]        | 4 [2-4]      | 4 [4-4]     | 4 [4-4]      | 3.5 [3-4]  |
| Of whom, How often patron asks not to use condom †    | 1.5 [1-2.5] | 2 [2-3]     | 2 [1-2]           | 2 [1-3]        | 2 [1-3]      | 2 [1-2]     | 2 [1-3]      | 2 [1-3]    |
| Ever had sex with others for money                    | 25%         | 62%         | 33%               | 50%            | 50%          | 43%         | 47%          | 50%        |
| Number of non-client partners in past 12m             | 2 [1-3]     | 1 [1-3]     | <b>1 [1-1]</b>    | <b>2 [1-3]</b> | 2 [1-3]      | 1 [1-3]     | 1 [1-3]      | 1.5 [1-3]  |
| Has a primary partner                                 | 69%         | 63%         | 75%               | 64%            | 74%          | 52%         | 62%          | 100%       |
| Of whom, used condom at last sex with primary partner | 11%         | 26%         | 11%               | 21%            | 12%          | 36%         | 16%          | 33%        |
| Currently using male condoms for FP                   | 40%         | 53%         | 40%               | 48%            | 38%          | 60%         | 43%          | 75%        |
| Ever taken an HIV test                                | 100%        | 93%         | 100%              | 95%            | 97%          | 95%         | 96%          | 100%       |
| Number of HIV tests ever taken                        | 3 [2-5]     | 3 [2-5]     | 3 [1.5-5.5]       | 3 [2-5]        | 3 [2-5]      | 3 [2-4]     | 3 [2-5]      | 3.5 [1-5]  |
| Months since last HIV test                            | 5 [4-10]    | 7 [4-13.5]  | 5 [3.5-9]         | 7 [4-12]       | 6.5 [5-15]   | 5.5 [3.5-7] | 6 [4-12]     | 8.5 [4-11] |
| Willing to complete HCT today                         | 25 [23-30]  | 25 [23-28]  | 23 [22-28.5]      | 25 [23-29]     | 25 [22-28]   | 25 [23-30]  | 25 [22-29]   | 27 [24-27] |

Values are counts (N column, interest in modality row), proportions or medians and interquartile ranges. USD: United States dollar; FP: Family planning; HCT: HIV counselling and testing. † 5-point scale; higher values indicate greater frequency. The two significant differences (at  $\alpha=0.05$ ) between variables based on a  $\chi^2_1$  test for binary factors and Kruskal-Wallis tests for continuous and ordinal factors are shown in bold.

1  
2  
3 **Figure 1: Female bar worker interest in, and ordered preferences for, various PrEP**  
4 **modalities**  
5  
6  
7

8  
9 A. Level of interest in each PrEP modality; B. Ordered preference for each PrEP modality. Numbers  
10 in figures are percentages of all respondents. PrEP: Pre-exposure prophylaxis.  
11  
12  
13  
14  
15  
16  
17  
18  
19  
20  
21  
22  
23  
24  
25  
26  
27  
28  
29  
30  
31  
32  
33  
34  
35  
36  
37  
38  
39  
40  
41  
42  
43  
44  
45  
46  
47  
48  
49  
50  
51  
52  
53  
54  
55  
56  
57  
58  
59  
60

For peer review only

1  
2  
3  
4  
5  
6  
7  
8  
9  
10  
11  
12  
13  
14  
15  
16  
17  
18  
19  
20  
21  
22  
23  
24  
25  
26  
27  
28  
29  
30  
31  
32  
33  
34  
35  
36  
37  
38  
39  
40  
41  
42  
43  
44  
45  
46  
47  
48  
49  
50  
51  
52  
53  
54  
55  
56  
57  
58  
59  
60

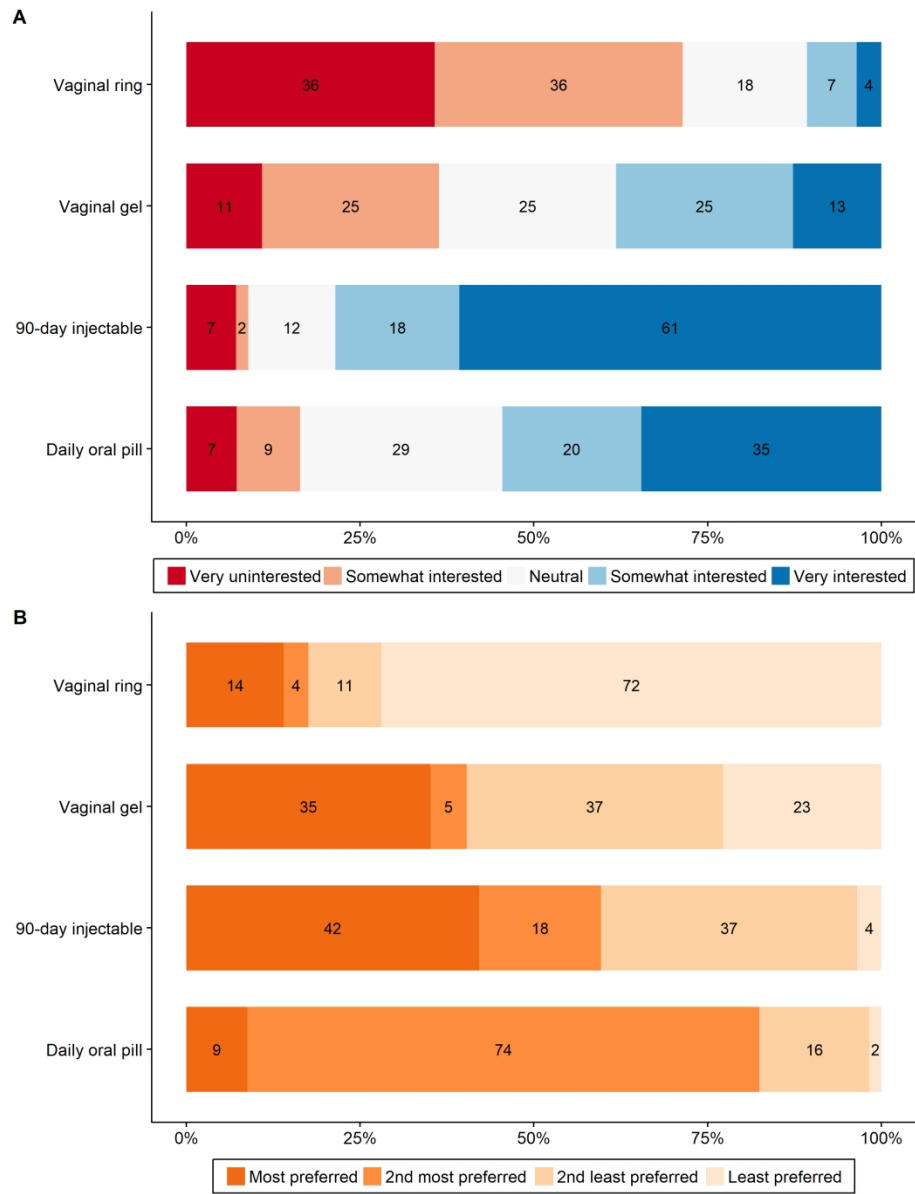

Female bar worker interest in, and ordered preferences for, various PrEP modalities

A. Level of interest in each PrEP modality; B. Ordered preference for each PrEP modality. Numbers in figures are percentages of all respondents. PrEP: Pre-exposure prophylaxis.

**STROBE 2007 (v4) Statement—Checklist of items that should be included in reports of *cross-sectional studies***

| Section/Topic                | Item # | Recommendation                                                                                                                                                                       | Reported on page # |
|------------------------------|--------|--------------------------------------------------------------------------------------------------------------------------------------------------------------------------------------|--------------------|
| Title and abstract           | 1      | (a) Indicate the study's design with a commonly used term in the title or the abstract                                                                                               | 1                  |
|                              |        | (b) Provide in the abstract an informative and balanced summary of what was done and what was found                                                                                  | 2                  |
| <b>Introduction</b>          |        |                                                                                                                                                                                      |                    |
| Background/rationale         | 2      | Explain the scientific background and rationale for the investigation being reported                                                                                                 | 5-6                |
| Objectives                   | 3      | State specific objectives, including any prespecified hypotheses                                                                                                                     | 6                  |
| <b>Methods</b>               |        |                                                                                                                                                                                      |                    |
| Study design                 | 4      | Present key elements of study design early in the paper                                                                                                                              | 6-7                |
| Setting                      | 5      | Describe the setting, locations, and relevant dates, including periods of recruitment, exposure, follow-up, and data collection                                                      | 6-7                |
| Participants                 | 6      | (a) Give the eligibility criteria, and the sources and methods of selection of participants                                                                                          | 7                  |
| Variables                    | 7      | Clearly define all outcomes, exposures, predictors, potential confounders, and effect modifiers. Give diagnostic criteria, if applicable                                             | 7                  |
| Data sources/<br>measurement | 8*     | For each variable of interest, give sources of data and details of methods of assessment (measurement). Describe comparability of assessment methods if there is more than one group | 7                  |
| Bias                         | 9      | Describe any efforts to address potential sources of bias                                                                                                                            | 7                  |
| Study size                   | 10     | Explain how the study size was arrived at                                                                                                                                            | 7                  |
| Quantitative variables       | 11     | Explain how quantitative variables were handled in the analyses. If applicable, describe which groupings were chosen and why                                                         | 7                  |
| Statistical methods          | 12     | (a) Describe all statistical methods, including those used to control for confounding                                                                                                | 7                  |
|                              |        | (b) Describe any methods used to examine subgroups and interactions                                                                                                                  | 7                  |
|                              |        | (c) Explain how missing data were addressed                                                                                                                                          | n/a                |
|                              |        | (d) If applicable, describe analytical methods taking account of sampling strategy                                                                                                   | n/a                |
|                              |        | (e) Describe any sensitivity analyses                                                                                                                                                | n/a                |
| <b>Results</b>               |        |                                                                                                                                                                                      |                    |



|                          |     |                                                                                                                                                                                                              |             |
|--------------------------|-----|--------------------------------------------------------------------------------------------------------------------------------------------------------------------------------------------------------------|-------------|
| Participants             | 13* | (a) Report numbers of individuals at each stage of study—eg numbers potentially eligible, examined for eligibility, confirmed eligible, included in the study, completing follow-up, and analysed            | 8           |
|                          |     | (b) Give reasons for non-participation at each stage                                                                                                                                                         | n/a         |
|                          |     | (c) Consider use of a flow diagram                                                                                                                                                                           | n/a         |
| Descriptive data         | 14* | (a) Give characteristics of study participants (eg demographic, clinical, social) and information on exposures and potential confounders                                                                     | 8 & Table 1 |
|                          |     | (b) Indicate number of participants with missing data for each variable of interest                                                                                                                          | Table 1     |
| Outcome data             | 15* | Report numbers of outcome events or summary measures                                                                                                                                                         | 8-9         |
| Main results             | 16  | (a) Give unadjusted estimates and, if applicable, confounder-adjusted estimates and their precision (eg, 95% confidence interval). Make clear which confounders were adjusted for and why they were included | 9-10        |
|                          |     | (b) Report category boundaries when continuous variables were categorized                                                                                                                                    | n/a         |
|                          |     | (c) If relevant, consider translating estimates of relative risk into absolute risk for a meaningful time period                                                                                             | n/a         |
| Other analyses           | 17  | Report other analyses done—eg analyses of subgroups and interactions, and sensitivity analyses                                                                                                               | n/a         |
| <b>Discussion</b>        |     |                                                                                                                                                                                                              |             |
| Key results              | 18  | Summarise key results with reference to study objectives                                                                                                                                                     | 10-11       |
| Limitations              | 19  | Discuss limitations of the study, taking into account sources of potential bias or imprecision. Discuss both direction and magnitude of any potential bias                                                   | 11          |
| Interpretation           | 20  | Give a cautious overall interpretation of results considering objectives, limitations, multiplicity of analyses, results from similar studies, and other relevant evidence                                   | 11          |
| Generalisability         | 21  | Discuss the generalisability (external validity) of the study results                                                                                                                                        | 11          |
| <b>Other information</b> |     |                                                                                                                                                                                                              |             |
| Funding                  | 22  | Give the source of funding and the role of the funders for the present study and, if applicable, for the original study on which the present article is based                                                | 16          |

\*Give information separately for cases and controls in case-control studies and, if applicable, for exposed and unexposed groups in cohort and cross-sectional studies.

**Note:** An Explanation and Elaboration article discusses each checklist item and gives methodological background and published examples of transparent reporting. The STROBE checklist is best used in conjunction with this article (freely available on the Web sites of PLoS Medicine at <http://www.plosmedicine.org/>, Annals of Internal Medicine at <http://www.annals.org/>, and Epidemiology at <http://www.epidem.com/>). Information on the STROBE Initiative is available at [www.strobe-statement.org](http://www.strobe-statement.org).

# BMJ Open

## HIV risk and Pre-exposure Prophylaxis interest among female bar workers in Dar es Salaam: a cross-sectional survey

|                                 |                                                                                                                                                                                                                                                                                                                                                                                                                                                                                                                                                                                                                                                                                                                                                                                                                                                                                                                                                                                                 |
|---------------------------------|-------------------------------------------------------------------------------------------------------------------------------------------------------------------------------------------------------------------------------------------------------------------------------------------------------------------------------------------------------------------------------------------------------------------------------------------------------------------------------------------------------------------------------------------------------------------------------------------------------------------------------------------------------------------------------------------------------------------------------------------------------------------------------------------------------------------------------------------------------------------------------------------------------------------------------------------------------------------------------------------------|
| Journal:                        | <i>BMJ Open</i>                                                                                                                                                                                                                                                                                                                                                                                                                                                                                                                                                                                                                                                                                                                                                                                                                                                                                                                                                                                 |
| Manuscript ID                   | bmjopen-2018-023272.R1                                                                                                                                                                                                                                                                                                                                                                                                                                                                                                                                                                                                                                                                                                                                                                                                                                                                                                                                                                          |
| Article Type:                   | Research                                                                                                                                                                                                                                                                                                                                                                                                                                                                                                                                                                                                                                                                                                                                                                                                                                                                                                                                                                                        |
| Date Submitted by the Author:   | 11-Dec-2018                                                                                                                                                                                                                                                                                                                                                                                                                                                                                                                                                                                                                                                                                                                                                                                                                                                                                                                                                                                     |
| Complete List of Authors:       | Harling, Guy; University College London, Institute for Public Health<br>Muya, Aisa; Management and Development for Health<br>Ortblad, Katrina; Harvard T.H. Chan School of Public Health, Global Health and Population<br>Mashasi, Irene; Management and Development for Health<br>Dambach, Peter; UniversitatsKlinikum Heidelberg, Institute of Public Health<br>Ulenga, Nzovu; Management and Development for Health<br>Barnhart, Dale; Harvard University T H Chan School of Public Health, Department of Epidemiology<br>Mboggo, Eric; Management and Development for Health<br>Oldenburg, Catherine; University of California San Francisco, Francis I Proctor Foundation; University of California San Francisco, Departments of Ophthalmology & Epidemiology and Biostatistics<br>Bärnighausen, Till ; UniversitatsKlinikum Heidelberg, Institute of Public Health; Africa Health Research Institute<br>Spiegelman, Donna; Harvard School of Public Health, Epidemiology & Biostatistics |
| <b>Primary Subject Heading</b>: | HIV/AIDS                                                                                                                                                                                                                                                                                                                                                                                                                                                                                                                                                                                                                                                                                                                                                                                                                                                                                                                                                                                        |
| Secondary Subject Heading:      | Epidemiology, Global health, Sexual health                                                                                                                                                                                                                                                                                                                                                                                                                                                                                                                                                                                                                                                                                                                                                                                                                                                                                                                                                      |
| Keywords:                       | Female bar workers, Barmaids, Tanzania, Pre-exposure prophylaxis, HIV prevention                                                                                                                                                                                                                                                                                                                                                                                                                                                                                                                                                                                                                                                                                                                                                                                                                                                                                                                |
|                                 |                                                                                                                                                                                                                                                                                                                                                                                                                                                                                                                                                                                                                                                                                                                                                                                                                                                                                                                                                                                                 |

SCHOLARONE™  
Manuscripts

1  
2  
3 **Title:** HIV risk and Pre-exposure Prophylaxis interest among female bar workers in Dar es  
4  
5 Salaam: a cross-sectional survey  
6  
7

8 **Running Head:** HIV risk and PrEP interest in Dar es Salaam barmaids  
9  
10

11 **Authors:** Guy Harling<sup>1,2</sup>, Aisa Muya<sup>3</sup>, Katrina F. Ortblad<sup>4</sup>, Irene Mashasi<sup>3</sup>, Peter Dambach<sup>5</sup>,  
12  
13 Nzovu Ulenga<sup>3</sup>, Dale Barnhart<sup>2</sup>, Eric Mboggo<sup>3</sup>, Catherine E. Oldenburg<sup>6,7,8</sup>, Till W.  
14  
15 Bärnighausen<sup>4,5,9</sup>, Donna Spiegelman<sup>2,4,10</sup>  
16  
17

18  
19 **Author affiliations:**  
20  
21

- 22 1. Institute for Global Health, University College London, London, UK
- 23 2. Department of Epidemiology, Harvard T.H. Chan School of Public Health, Boston, MA
- 24 3. Management and Development for Health, Dar es Salaam, Tanzania
- 25 4. Department of Global Health and Population, Harvard T.H. Chan School of Public Health,  
26 Boston, MA
- 27 5. Institute of Public Health, University of Heidelberg, Heidelberg, Germany
- 28 6. Francis I. Proctor Foundation, University of California, San Francisco, CA
- 29 7. Department of Ophthalmology, University of California, San Francisco, CA
- 30 8. Department of Epidemiology and Biostatistics, University of California, San Francisco,  
31 CA
- 32 9. Africa Health Research Institute, KwaZulu-Natal, South Africa
- 33 10. Departments of Biostatistics and Nutrition, Harvard T.H. Chan School of Public Health,  
34 Boston, MA
- 35
- 36
- 37
- 38
- 39
- 40
- 41
- 42
- 43
- 44
- 45

46 **Address for correspondence:** Guy Harling. Institute for Global Health, University College  
47  
48 London, Mortimer Market Centre, London, WC1E 6JB. [g.harling@ucl.ac.uk](mailto:g.harling@ucl.ac.uk)  
49  
50  
51  
52  
53  
54  
55  
56  
57  
58  
59  
60

## ABSTRACT

**Objective:** Female bar workers (FBW) in East Africa often conduct sex work to supplement their incomes, and may be vulnerable to HIV acquisition. Pre-exposure prophylaxis (PrEP) offers protection against HIV acquisition. However, there is little research on FBW's sexual health. Our objective was to determine HIV risk behaviors and interest in PrEP among FBW in the largest city in East Africa.

**Design:** Cross-sectional survey covering respondents' work and personal lives, including social and behavioral risk factors for HIV. Those who did not report being HIV-positive were asked about their knowledge of and interest in PrEP. All women were offered free on-site HIV testing and counselling (HTC).

**Setting:** Eight randomly selected workplaces, i.e. bars, in Kinondoni district, Dar es Salaam (DSM).

**Participants:** 66 FBW ( $\geq 18$  years) selected at random from all women working in selected bars on the day of visit.

**Results:** Half of respondents reported having had sex for money: 20% with bar clients only, 15% with other men only and 15% with both. Almost all (98%) reported  $\geq 1$  non-commercial partners in the past 12 months; only 30% reported using condoms with these partners. 85% of respondents had ever been pregnant; 44% had had an unintended pregnancy. Only 5% of respondents had ever heard of PrEP. However, 54% were somewhat/very interested in daily-pill PrEP and 79% were somewhat/very interested in long-acting injectable PrEP. When asked to rank modalities, long-acting injectable PrEP was the most-preferred. Seven percent of the 56 respondents who completed HTC tested HIV-positive.

1  
2  
3 **Conclusions:** FBW in DSM have elevated risk factors for HIV acquisition, and PrEP appears  
4 highly acceptable. Studies assessing PrEP initiation and adherence in FBW appear warranted.  
5  
6  
7  
8  
9  
10

11 **Keywords:** Female bar workers; Barmaids; Tanzania; Pre-exposure prophylaxis; HIV  
12 prevention  
13  
14  
15  
16  
17  
18  
19  
20  
21  
22  
23  
24  
25  
26  
27  
28  
29  
30  
31  
32  
33  
34  
35  
36  
37  
38  
39  
40  
41  
42  
43  
44  
45  
46  
47  
48  
49  
50  
51  
52  
53  
54  
55  
56  
57  
58  
59  
60

For peer review only

## STRENGTHS AND LIMITATIONS OF THIS STUDY

- The study population was selected at random from among all female bar workers in one of the three districts of the city of Dar es Salaam.
- HIV serostatus was evaluated using a rapid diagnostic test to avoid differential or non-differential misreporting.
- The sample is relatively small, potentially limiting power to see significant differences within subgroups.
- The sensitive nature of many of the HIV risk factors considered, and the self-report methods employed by the survey, may have led to underreporting of risk behaviours.
- It is unclear how far the findings of this work can be generalized geographically.

## INTRODUCTION

Female sex workers (FSW), i.e. women who receive money or other goods in exchange for sexual services, are a key population for the HIV epidemic in sub-Saharan Africa (SSA). These women are at especially high risk of acquiring and transmitting HIV and other sexually transmitted infections (STI).<sup>1</sup> There is substantial research on how sex workers (SW) contribute to,<sup>2</sup> and are impacted by,<sup>3</sup> the HIV epidemic in SSA.

Sex workers are sometimes divided into 'direct' sex workers for whom it is a primary profession, and 'indirect' sex workers, for whom it is a supplementary source of income.<sup>4</sup>

Indirect sex workers may be particularly important for HIV epidemics if they do not self-identify as sex workers, and thus are not reached by or do not access HIV prevention services such as those targeting direct FSW. In East Africa, female bar workers (FBW), women who either sell or deliver drinks to customers in commercial establishments, often act as indirect FSW.

FBW, or barmaids, often do not self-identify as FSW,<sup>5 6</sup> and, in contrast to bar-based direct FSW, are employed by bars to provide non-sexual services. However, past quantitative research has shown that a substantial minority of FBW (35-45%) have sex in return for money, often with bar clients.<sup>7 8</sup> FBW are often stigmatized and considered by others to be FSW.<sup>9 10</sup> Qualitative work suggests FBW have limited ability to protect themselves against STIs and other adverse consequences of sex work, notably when negotiating condom use.<sup>11-13</sup> While precise numbers are hard to obtain, FBWs likely comprise a large proportion of the 'accommodation and food service activities' employment category, which accounted for 6.5% of all employed Tanzanian women aged >15 in 2014,<sup>14</sup> and it has been claimed that FBWs are the largest single employment group in Tanzania.<sup>15</sup>

1  
2  
3 There is substantial evidence – both direct and indirect – for structural, behavioural and  
4  
5 biomedical interventions that should be able to reduce HIV acquisition and transmission  
6  
7 among FSW.<sup>16</sup> Structural approaches include community mobilization, advocacy and social and  
8  
9 economic empowerment alongside anti-discrimination policies including legal protection.  
10  
11 Behavioural approaches include peer and community-based behaviour change, condom  
12  
13 provision. However, many of these interventions are highly context-specific and have proven  
14  
15 difficult to implement consistently.<sup>17</sup> Biomedical interventions may be more easily  
16  
17 implemented in a wide range of settings. Proven biomedical approaches for FSW include FSW-  
18  
19 friendly provision of services such as voluntary testing, linkage to care and antiretroviral  
20  
21 treatment – including prevention of mother-to-child transmission and post-exposure  
22  
23 prophylaxis. There is no evidence at present as to how FSW-applicable interventions affect  
24  
25 FBWs.  
26  
27  
28  
29  
30  
31

32 Pre-exposure prophylaxis (PrEP) is an important biomedical HIV prevention tool, proven to  
33  
34 substantially prevent HIV acquisition when taken as prescribed.<sup>18 19</sup> There are several planned  
35  
36 and ongoing PrEP demonstration projects in Africa.<sup>20 21</sup> However, previous PrEP studies have  
37  
38 found variable adherence.<sup>22</sup> Few PrEP trials have explicitly included FSW in their inclusion  
39  
40 criteria – although some included proportions of unmarried women with multiple partners  
41  
42 who reported histories of transactional sex<sup>16</sup> – and to our knowledge none have targeted FBW.  
43  
44 Evidence from FSW from South Africa,<sup>23</sup> Kenya<sup>24</sup> and Zimbabwe<sup>25</sup> points to variable levels of  
45  
46 uptake but rapidly declining retention of FSW on daily pill-based PrEP. Most published PrEP  
47  
48 studies have focused on daily pill-based PrEP, although one study showed effectiveness for on-  
49  
50 demand pills among men-who-have-sex-with-men (MSM).<sup>26</sup> However, other prevention  
51  
52 modalities have been considered, including long-acting injectables,<sup>27 28</sup> vaginal gels<sup>29</sup> and  
53  
54 vaginal rings.<sup>30</sup>  
55  
56  
57  
58  
59  
60



1  
2  
3 The World Health Organization (WHO) recommends PrEP for populations with an annual risk  
4 of HIV acquisition greater than 3%,<sup>31</sup> and as such it is likely to be a key intervention for  
5 reducing HIV among FSW internationally.<sup>32</sup> Several countries in Africa with generalized  
6 epidemics have included FSW among the key populations eligible for PrEP,<sup>33-35</sup> but few if any  
7 had begun widespread implementation for FSW by mid-2017. Past research has shown high  
8 acceptability of daily-pill PrEP amongst FSW hypothetically in a range of settings,<sup>36</sup> and in  
9 practice in Kenya.<sup>37</sup> While FBW acquisition risk may be lower on average than direct sex  
10 workers, it may well be that they meet the WHO criterion for PrEP.  
11  
12  
13  
14  
15  
16  
17  
18  
19  
20  
21  
22

23 At the time of this study, PrEP was not available anywhere within Tanzania. Two assessments  
24 of interest and barriers to PrEP amongst adolescent girls and young women conducted in 2017  
25 and found high interest but concerns around cost, side-effects and stigma.<sup>38 39</sup> As part of one of  
26 these studies, healthcare providers were largely supportive of PrEP provision, although they  
27 were concerned about behavioural disinhibition and work overload.<sup>40</sup> Evidence specifically on  
28 FSW is not currently available.  
29  
30  
31  
32  
33  
34  
35  
36

37 Although many FBW also act as FSW, there is limited evidence on how much risky sexual  
38 behaviour FBW engage in. To our knowledge, there is no research on the acceptability of PrEP  
39 amongst FBW. We therefore conducted a study to determine HIV prevalence, HIV-related risk  
40 factors, and initial interest in and acceptability of PrEP amongst FBW in Dar es Salaam  
41 municipality (DSM), Tanzania, the largest city in eastern Africa.  
42  
43  
44  
45  
46  
47  
48  
49  
50  
51  
52

## 53 **METHODS**

54  
55  
56 We conducted a cross-sectional study using a two-stage sampling method in January 2017. We  
57 first randomly selected eight bars from a paper listing of all licensed premises in Kinondoni  
58  
59  
60

1  
2  
3 district, DSM (one of three in the municipality). We repeatedly sampled without replacement  
4  
5 first a page number and then line number from the listing. Our work was a feasibility study for  
6  
7 a larger study, and thus no formal power calculation was used to establish sample size.  
8

9  
10 However, our sample of 56 individuals with HIV tests gave us 66% power to provide 95%  
11  
12 confidence intervals of +/- 10% around an expected HIV prevalence estimate of 20%.  
13  
14

15  
16 The field team visited each bar at a time arranged by telephone with each bar's licensee. After  
17  
18 explaining the study first to the bar manager and then to all FBW present, FBW were invited to  
19  
20 participate in a computer-assisted personal interview (CAPI), and then complete HIV testing  
21  
22 and counselling (HTC). Study inclusion criteria were being 18 years or older and working as a  
23  
24 FBW at the time of study visit. Between 6 and 12 FBW – depending on the length of each  
25  
26 interview – were chosen at random within each bar based on a list drawn up by the bar  
27  
28 manager at first bar entry. All interviews were conducted in a three-wheel taxi (*bajaji*) with  
29  
30 closed sides parked close to the bar, to ensure privacy.  
31  
32  
33

34  
35 The CAPI covered several topics, including: women's socio-demographics; their work history;  
36  
37 their sexual history, including past STI diagnoses and HIV testing; their knowledge of HIV  
38  
39 prevention modalities; substance use; and psychological wellbeing (depression, post-traumatic  
40  
41 stress disorder (PTSD) and generalized social support). For depression we asked the PHQ-9  
42  
43 scale, which has previously been used with Tanzanian women living with HIV.<sup>41</sup> We assessed  
44  
45 PTSD using the PTSD-IV screening tool. Generalized social support was measured using a 10-  
46  
47 item version of the Duke-UNC Functional Social Support Questionnaire (FSSQ), adapted to  
48  
49 include instrumental support and validated for Tanzanian women.<sup>42</sup> Potential responses to  
50  
51 each FSSQ question were: "as much as I would like" (4); "less than I would like" (3); "much less  
52  
53 than I would like" (2); and "never" (1). A mean score <3 is considered as 'low social support'.  
54  
55  
56  
57  
58  
59  
60

1  
2  
3 Respondents were asked if they had ever heard of PrEP or a daily pill to prevent HIV infection.  
4  
5 Then, following a brief description of each modality, they were asked how interested they were  
6  
7 in taking PrEP as: (i) a daily pill; (ii) an injection every 3 months; (iii) a pericoital vaginal gel;  
8  
9 (iv) a monthly vaginal ring. For each PrEP modality interest was gauged on a five-point scale:  
10  
11 very interested; somewhat interested; neutral; somewhat uninterested; very uninterested.  
12  
13 Finally, they were asked to rank the four modalities from most to least preferred. All PrEP  
14  
15 questions are presented in Supplementary Material 1. Questions about PrEP were not asked to  
16  
17 those who self-reported having previously tested HIV-positive, and due to a coding error were  
18  
19 not asked at the first bar visited. Anyone testing positive for HIV and not already linked to care  
20  
21 was referred to their clinic of choice.  
22  
23  
24  
25  
26

27  
28 In this analysis, we provide descriptive statistics for various potential risk and protective  
29  
30 factors for HIV acquisition. We then assess bivariate associations between these factors and  
31  
32 interest in various modalities of PrEP, using  $\chi^2$  tests for binary variables and Kruskal-Wallis  
33  
34 tests for continuous and ordinal variables. We dichotomized PrEP interest as either positive  
35  
36 (very interested or somewhat interested) or not (neutral, somewhat uninterested or very  
37  
38 uninterested), in order to evaluate which factors were and were not associated with active  
39  
40 interest in PrEP. HIV status was measured based on HIV test result.  
41  
42  
43  
44

45 The study received ethical approval from Harvard T.H. Chan School of Public Health and the  
46  
47 Tanzanian National Institute for Medical Research. Written informed consent was obtained  
48  
49 from each participant.  
50  
51  
52  
53  
54  
55  
56  
57  
58  
59  
60

## Participant and Public Involvement

Neither patients nor public were directly involved in the development, design or recruitment of the study. HIV test results were provided to participants at point of testing; results will not otherwise be disseminated directly to study participants.

## RESULTS

### Participant characteristics

Sixty-six FBW were invited to participate in the study and all agreed (Table 1). Most of the women were in their twenties (median age 26, interquartile range [IQR]: 23-30). Almost all the women (91%) were born outside of DSM. FBW had been working as barmaids for a median of two years (IQR: 4 months to 4 years). Only 9% FBW planned to continue working as FBW, all but one of whom planned to stop within two years. FBW reported a median monthly income of \$91 (IQR: \$68-136). Most FBW (85%) had been pregnant in the past, 44% reported having had an unintended pregnancy and 39% a miscarriage or termination. 71% of FBW had a living child at the time of interview (median 1, IQR: 1-2).

Psychometric properties for the wellbeing measures were acceptable: Cronbach's alpha was 0.71 for PHQ-9, 0.71 for the PTSD-IV and 0.85 for FSSQ. Based on standard score summation, 20% of respondents showed depressive symptoms, while 21% affirmed 3 or 4 PTSD-IV questions and thus screened positive for possible PTSD, and 58% had a mean FSSQ score <3 and thus had low social support.

Almost all (96%) of FBW had previously taken an HIV test (median 3 tests in lifetime, IQR: 2-5), with 53% having tested within the past six months and 78% within the past 12. Three women

1  
2  
3 (5%) had previously tested positive for HIV. Fifty-six FBW (85%) consented to test for HIV and  
4  
5 four of these (7%) tested positive; only one had not previously received a positive test result.  
6  
7

### 8 **HIV acquisition risk factors**

9  
10  
11 Exactly half of FBW reported ever having had sex with someone in return for money: 20% only  
12  
13 with bar clients; 15% only with other men; and 15% with both. Of the 35% FBW reporting sex  
14  
15 with bar clients, 74% reported asking clients to use condoms often or always. A majority  
16  
17 (52%) reported that clients sometimes or often asked not to use condoms, but only 8% of FBW  
18  
19 reported often or always agreeing not to use condoms in situations where they want to use a  
20  
21 condom but their clients has asked not to. FBW also reported a median of two non-commercial  
22  
23 partners in the past 12 months (IQR: 1-3, maximum 8). 68% of FBW reported having a primary  
24  
25 partner, and only 18% of these women reported using a condom at last sex with this partner.  
26  
27 Only 30% of FBW reported using male or female condoms as a family planning method, while  
28  
29 another 24% reported using pills, injectables or implants. Almost half (47%) of respondents  
30  
31 believed they were either at great risk of, or certain to become infected with, HIV.  
32  
33  
34  
35  
36  
37

### 38 **PrEP interest**

39  
40  
41 Questions about PrEP were asked to 56 women (3 had previously tested HIV positive, 7 were  
42  
43 in the first bar visited). Only 5% of these FBW had ever heard of PrEP, however 54% were  
44  
45 either somewhat or very interested in a daily pill that protected against HIV infection, and only  
46  
47 16% were uninterested (Figure 1A). When asked about other potential treatment modalities,  
48  
49 79% of FBW were interested or very interested in long-acting injectable PrEP, 38% in vaginal  
50  
51 gel PrEP and only 11% in monthly vaginal ring PrEP. Only one women was somewhat or very  
52  
53 uninterested in any type of PrEP. Level of interest in daily-pill PrEP was statistically  
54  
55 significantly correlated with interest in long-acting injectable PrEP ( $\rho = 0.40$ ,  $p=0.003$ ), but not  
56  
57  
58  
59  
60

1  
2  
3 with either vaginal modality. When asked to rank the four modalities, the most preferred  
4  
5 method was long-acting injectable PrEP, although 82% of women ranked daily-pill PrEP as  
6  
7 either their first or second preference (Figure 1B). Restricting our sample to all respondents  
8  
9 with at least 'neutral' (96%) or at least 'somewhat interested' (86%) responses for at least one  
10  
11 PrEP modality did not change these patterns.  
12  
13  
14

### 15 **Correlates of PrEP interest**

16  
17  
18 Associations between interest in each PrEP modality and the range of HIV risk factors are  
19  
20 presented in Table 2. There was no significant difference in interest level (very/somewhat  
21  
22 interested vs. neutral or somewhat/very uninterested) in daily-pill PrEP for those who did/did  
23  
24 not report any sex for money (60% vs. 46%,  $p=0.30$ ). This pattern was similar for those who  
25  
26 did/did not report sex for money with bar clients (62% vs 49%,  $p=0.33$ ) and those who  
27  
28 did/did not report sex for money with others (59% vs 51%,  $p=0.60$ ). Interest in long-acting  
29  
30 injectable PrEP was similarly not significantly associated with having had sex in return for  
31  
32 money (any sex for money: 80% vs 77%,  $p=0.78$ ; sex for money with bar clients: 86% vs. 74%,  
33  
34  $p=0.31$ ; sex for money with non-bar clients: 76% vs 79%,  $p=0.80$ ). The only socio-demographic  
35  
36 or behavioral factor associated with significantly higher interest in daily-pill PrEP was a  
37  
38 history of miscarriage or termination (61% vs. 39%,  $p=0.04$ ). The only factor associated with  
39  
40 significantly higher interest in long-acting injectable PrEP was number of non-client partners  
41  
42 in the past 12 months (interest: median 2, IQR: 1-3; no interest: median 1, IQR: 1-1;  $p=0.03$ ).  
43  
44  
45 Willingness to consent for an HIV test was not significantly associated with interest in daily-pill  
46  
47 PrEP (54% vs 50%,  $p=0.83$ ).  
48  
49  
50  
51  
52  
53  
54  
55  
56  
57  
58  
59  
60

## DISCUSSION

In a random sample of 66 FBW from bars in DSM, HIV prevalence was low (similar to the 7% prevalence for 25-29 year old women nationally, and 8% for 15-49 year old women in DSM, in 2011-12, the most-recent nationally representative survey<sup>43</sup>). However risk factors for HIV acquisition were substantial – including multiple partners, moderate to low condom use, and substantial levels of sex for money. The proportion of FBW reporting sex for money was similar to earlier quantitative studies.<sup>7 8</sup>

Awareness of PrEP for HIV prevention was very low but interest in PrEP, particularly for daily pills and long-acting injectables, was high. Both these modalities are likely to be recognizable to women in Tanzania since family planning options have similar modes of delivery, e.g. daily contraceptive pills, injectable Depo-Provera and implanted Nur-Isterate. Greater interest in long-acting injectables may also reflect the difficulties of taking daily pills for these working women, and of applying gels prior to sex when timing of sex acts is unpredictable and sometimes not chosen by them. These findings thus resonate with those of earlier work in other sub-Saharan African settings with FSW, which found limited retention on daily pill-based PrEP.<sup>23-25</sup>

While many of differences in PrEP interest were not significant in this small sample (and none remain significant if we adjust for multiple testing using the Holm-Bonferroni or any other method), respondents who reported having sex for money (either with bar clients or others), those who had had a miscarriage or abortion and those with more non-client partners all reported greater interest in PrEP. This pattern of findings, if reproduced in other data, would suggest that those FBW with a higher risk profile for sexually transmitted diseases have a rationally greater interest in PrEP. It was also notable that PrEP interest was similar for those

1  
2  
3 having sex either with bar clients or with others; if efforts are made to determine which FBWs  
4  
5 are having sex for money, inquiries should not be limited to bar patrons.  
6  
7

8  
9 This study highlights that FBW in Dar are at substantial risk for HIV acquisition, that many are  
10  
11 aware that they are at substantial risk and following discussion many are interested PrEP.  
12

13  
14 However, this is only the first stage of the PrEP care continuum,<sup>44</sup> FBW will additionally need  
15  
16 assistance in accessing PrEP and remaining in care. Both of these stages are likely to be  
17  
18 hampered by the stigma and fluidity of life situation that working as an FBW can bring.  
19

20  
21 While no PrEP is currently available to Tanzanian women, daily-pill PrEP demonstration trials  
22  
23 will begin in key Tanzanian populations in 2018 and long-acting injectable PrEP has reached  
24  
25 phase-III trials elsewhere through HPTN-084.<sup>45</sup> Successful PrEP strategies for FBW will require  
26  
27 tailored PrEP programming for such women, mostly likely including clinical care provided  
28  
29 outside standard clinics. One important option here might be workplace-based service  
30  
31 provision – since the bar location forms a multi-year basis for work for the majority of  
32  
33 respondents.  
34  
35  
36

### 37 38 **Strengths and limitations**

39  
40  
41 This study provides a first insight into the HIV serostatus and PrEP interest of FBW in DSM.  
42  
43 While the sample in this study is small, it was a random sample drawn from a full enumeration  
44  
45 of all licensed premises (n>2500) in Kinondoni district, an area with a population of over  
46  
47 1,750,000 inhabitants in 2012,<sup>46</sup> and then a full enumeration of all FBW working in each bar at  
48  
49 the time of first visit. Nevertheless, it is possible that the sample of women drawn differs on  
50  
51 some characteristics from other FBW in Kinondoni. Furthermore, our small sample size means  
52  
53 that we cannot rule out some substantial but not significant associations in fact reflecting true  
54  
55 associations that this study lacks the power to confirm. Further analysis with additional FBWs  
56  
57  
58  
59  
60



1  
2  
3 would allow the separation of truly null associations from underpowered analyses. Similarly,  
4  
5 we are not able to conduct multivariable analysis in this dataset, something that would be  
6  
7 important in follow-up work.  
8  
9

10  
11 Caution is needed in generalizing beyond Kinondoni to the rest of DSM, as well as to other  
12  
13 areas of Tanzania and East Africa. However, even should the results only be applicable within  
14  
15 Kinondoni or DSM, our results suggest that a very large number of FBWs in this region are at  
16  
17 risk of HIV acquisition and local interventions may be warranted. Additionally, since many of  
18  
19 the questions asked were sensitive ones, and the responses self-reported through face-to-face  
20  
21 interviews, FBW may have underreported some risk behaviours. The potential for social  
22  
23 desirability bias to affect questions about PrEP was lessened by the very low baseline  
24  
25 awareness of this HIV prevention option.  
26  
27  
28  
29  
30  
31  
32

### 33 **CONCLUSIONS**

34  
35  
36  
37 Based on these data, FBW appear to be a key population for HIV prevention efforts, both to  
38  
39 protect themselves and their partners. PrEP seems acceptable to FBW in DSM, and this study  
40  
41 also showed the feasibility of contacting FBW at their workplaces. Nevertheless, further  
42  
43 information is needed on the feasibility of delivering PrEP and supporting HIV-related health  
44  
45 services in this population. Studies assessing PrEP initiation and adherence among FBW  
46  
47 appear warranted.  
48  
49  
50  
51  
52  
53  
54  
55  
56  
57  
58  
59  
60

**REFERENCES**

1. Baral S, Beyrer C, Muessig K, et al. Burden of HIV among female sex workers in low-income and middle-income countries: a systematic review and meta-analysis. *Lancet Infect Dis* 2012;12(7):538-49.
2. Gouws E, Cuchi P. Focusing the HIV response through estimating the major modes of HIV transmission: a multi-country analysis. *Sex Transm Infect* 2012;88(Suppl 2):i76-i85.
3. Shannon K, Strathdee SA, Goldenberg SM, et al. Global epidemiology of HIV among female sex workers: influence of structural determinants. *Lancet* 2015;385(9962):55-71.
4. Harcourt C, Donovan B. The many faces of sex work. *Sex Transm Infect* 2005;81(3):201-06.
5. Sori AT. Poverty, sexual experience and HIV vulnerability risks: evidence from Addis Ababa, Ethiopia. *J Biosoc Sci* 2012;44(6):677-701.
6. Rosenheck R, Ngilangwa D, Manongi R, Kapiga S. Treatment-seeking behavior for sexually transmitted infections in a high-risk population. *AIDS Care* 2010;22(11):1350-58.
7. Ao TT, Sam NE, Masenga EJ, Seage III GR, Kapiga SH. Human immunodeficiency virus type 1 among bar and hotel workers in northern Tanzania: the role of alcohol, sexual behavior, and herpes simplex virus type 2. *Sex Transm Dis* 2006;33(3):163-69.
8. Riedner G, Rusizoka M, Hoffmann O, et al. Baseline survey of sexually transmitted infections in a cohort of female bar workers in Mbeya Region, Tanzania. *Sex Transm Infect* 2003;79(5):382-87.
9. van Blerk L. Negotiating boundaries: the sex work identities of 'bar girls' in Nazareth, Ethiopia. *Gender, Place and Culture* 2011;18(02):217-33.
10. Kerrigan D, Mbwambo J, Likindikoki S, et al. Project Shikamana: Baseline Findings From a Community Empowerment-Based Combination HIV Prevention Trial Among Female Sex Workers in Iringa, Tanzania. *J Acquir Immune Defic Syndr* 2017;74(Suppl 1):S60.
11. Beckham S. "Like Any Other Woman"? Pregnancy, Motherhood, and HIV among Sex Workers in Southern Tanzania. Johns Hopkins University, 2013.

12. Talle A. Bar workers at the border. In: Klepp K-I, Biswalo PM, Talle A, eds. Young people at risk: fighting AIDS in northern Tanzania. Oslo, Norway: Scandinavian University Press, 1995:18-30.
13. Van Blerk L. Poverty, migration and sex work: youth transitions in Ethiopia. *Area* 2008;40(2):245-53.
14. National Bureau of Statistics (NBS) [Tanzania]. Tanzania Integrated Labour Force Survey 2014. Dar es Salaam: NBS,, 2014.
15. Akarro RR. Some factors associated with condom use among bar maids in Tanzania. *J Biosoc Sci* 2009;41(01):125-37.
16. Bekker L-G, Johnson L, Cowan F, et al. Combination HIV prevention for female sex workers: what is the evidence? *Lancet* 2015;385(9962):72-87.
17. Iskarpatyoti BS, Lebov J, Hart L, Thomas J, Mandal M. Evaluations of Structural Interventions for HIV Prevention: A Review of Approaches and Methods. *AIDS Behav* 2018;22(4):1253-64.
18. Baeten JM, Donnell D, Ndase P, et al. Antiretroviral prophylaxis for HIV prevention in heterosexual men and women. *N Engl J Med* 2012;367(5):399-410.
19. Thigpen MC, Kebaabetswe PM, Paxton LA, et al. Antiretroviral preexposure prophylaxis for heterosexual HIV transmission in Botswana. *N Engl J Med* 2012;367(5):423-34.
20. AVAC. HIV Prevention Research & Development Database. 10 April 2017 2016. <http://www.avac.org/pxrd>. (accessed 22 August 2017).
21. Cowan F, Delany-Moretlwe S, Sanders EJ, et al. PrEP implementation research in Africa: what is new? *J Int AIDS Soc* 2016;19(Suppl 6):21101.
22. Van der Straten A, Van Damme L, Haberer JE, Bangsberg DR. Unraveling the divergent results of pre-exposure prophylaxis trials for HIV prevention. *AIDS* 2012;26(7):F13-F19.
23. Eakle R, Gomez GB, Mbogua J, et al. Treatment And Prevention for Female Sex Workers in South Africa: First-year Results for the TAPS Demonstration Project. HIV Research for Prevention. Chicago, IL, 2016.

- 1  
2  
3 24. Kyongo J, Kiragu M, Nduta S, et al. Oral PrEP for HIV Prevention: Early Lessons from a PrEP  
4 Demonstration Project in Kenya. HIV Research for Prevention. Chicago, IL, 2016.  
5  
6  
7  
8 25. Cowan FM, Davey C, Fearon E, et al. Targeted combination prevention to support female sex  
9 workers in Zimbabwe accessing and adhering to antiretrovirals for treatment and  
10 prevention of HIV (SAPPH-IRe): a cluster-randomised trial. *The lancet HIV*  
11 2018;5(8):e417-e26.  
12  
13  
14  
15 26. Molina J-M, Capitant C, Spire B, et al. On-demand preexposure prophylaxis in men at high  
16 risk for HIV-1 infection. *N Engl J Med* 2015;373(23):2237-46.  
17  
18  
19  
20 27. Landovitz RJ, Kofron R, McCauley M. The Promise and Pitfalls of Long Acting Injectable  
21 Agents for HIV Prevention. *Curr Opin HIV AIDS* 2016;11(1):122.  
22  
23  
24  
25 28. Margolis DA, Gonzalez-Garcia J, Stellbrink H-J, et al. Long-acting intramuscular cabotegravir  
26 and rilpivirine in adults with HIV-1 infection (LATTE-2): 96-week results of a  
27 randomised, open-label, phase 2b, non-inferiority trial. *Lancet* 2017.  
28  
29  
30  
31 29. Karim QA, Karim SSA, Frohlich JA, et al. Effectiveness and safety of tenofovir gel, an  
32 antiretroviral microbicide, for the prevention of HIV infection in women. *Science*  
33 2010;329(5996):1168-74.  
34  
35  
36  
37 30. Baeten JM, Palanee-Phillips T, Brown ER, et al. Use of a vaginal ring containing dapivirine  
38 for HIV-1 prevention in women. *N Engl J Med* 2016;375(22):2121-32.  
39  
40  
41  
42 31. World Health Organization. *Consolidated guidelines on the use of antiretroviral drugs for*  
43 *treating and preventing HIV infection: recommendations for a public health approach.*  
44 Geneva: World Health Organization, 2016.  
45  
46  
47  
48 32. Beyrer C, Crago A-L, Bekker L-G, et al. An action agenda for HIV and sex workers. *Lancet*  
49 2015;385(9964):287-301.  
50  
51  
52  
53 33. South African National AIDS Council (SANAC). The South African National Sex Worker HIV  
54 Plan 2016-2019. Pretoria, South Africa: SANAC, 2016.  
55  
56  
57 34. National AIDS & STI Control Programme (NASCOP). Framework for the Implementation of  
58 Pre-exposure Prophylaxis of HIV in Kenya. Nairobi, Kenya: NASCOP, 2017.  
59  
60

- 1  
2  
3 35. Botswana Ministry of Health. Handbook of the Botswana 2016 integrated HIV clinical care  
4 guidelines. Gabarone, Botswana: Botswana Ministry of Health, 2016.  
5  
6
- 7  
8 36. Koechlin FM, Fonner VA, Dalglish SL, et al. Values and preferences on the use of oral pre-  
9 exposure prophylaxis (PrEP) for HIV prevention among multiple populations: a  
10 systematic review of the literature. *AIDS Behav* 2017;21(5):1325-35.  
11  
12
- 13  
14 37. Van der Elst EM, Mbogua J, Operario D, et al. High acceptability of HIV pre-exposure  
15 prophylaxis but challenges in adherence and use: qualitative insights from a phase I trial  
16 of intermittent and daily PrEP in at-risk populations in Kenya. *AIDS Behav*  
17 2013;17(6):2162-72.  
18  
19
- 20  
21 38. Population Council. Adolescent girls and young women's perceptions of oral pre-exposure  
22 prophylaxis introduction in Tanzania: findings from implementation science research".  
23 DREAMS Tanzania Results Brief 3. Washington, DC: Population Council, 2017.  
24  
25
- 26  
27 39. Lees S, Scorgie F, Khoza N, et al. Understanding motives for initiating PrEP amongst  
28 adolescent girls and young women (AGYW) in South Africa and Tanzania. *AIDS* 2018.  
29 Amsterdam, the Netherlands, 2018.  
30  
31
- 32  
33 40. Pilgrim N, Jani N, Mathur S, et al. Provider perspectives on PrEP for adolescent girls and  
34 young women in Tanzania: The role of provider biases and quality of care. *PLoS ONE*  
35 2018;13(4):e0196280.  
36  
37
- 38  
39 41. Belenky NM, Cole SR, Pence BW, Itemba D, Maro V, Whetten K. Depressive symptoms, HIV  
40 medication adherence, and HIV clinical outcomes in Tanzania: a prospective,  
41 observational study. *PLoS ONE* 2014;9(5):e95469.  
42  
43
- 44  
45 42. Antelman G, Fawzi MCS, Kaaya S, et al. Predictors of HIV-1 serostatus disclosure: a  
46 prospective study among HIV-infected pregnant women in Dar es Salaam, Tanzania. *AIDS*  
47 2001;15(14):1865-74.  
48  
49
- 50  
51 43. Tanzania Commission for AIDS (TACAIDS), Zanzibar AIDS Commission (ZAC), National  
52 Bureau of Statistics (NBS), Office of the Chief Government Statistician (OCGS), ICF  
53 International. Tanzania HIV/AIDS and Malaria Indicator Survey 2011-12. Dar es Salaam,  
54 Tanzania: TACAIDS, ZAC, NBS, OCGS, and ICF International, 2013.  
55  
56  
57  
58  
59  
60

- 1  
2  
3 44. Nunn AS, Brinkley-Rubinstein L, Oldenburg CE, et al. Defining the HIV pre-exposure  
4 prophylaxis care continuum. *AIDS (London, England)* 2017;31(5):731.  
5  
6  
7  
8 45. NIH Launches First Large Trial of a Long-Acting Injectable Drug for HIV Prevention: Study  
9 to Test Efficacy, Safety of Injectable Cabotegravir Compared to Daily Oral PrEP. 20 Dec  
10 2016 2016. [https://www.niaid.nih.gov/news-events/nih-launches-first-large-trial-long-](https://www.niaid.nih.gov/news-events/nih-launches-first-large-trial-long-acting-injectable-drug-hiv-prevention)  
11 [acting-injectable-drug-hiv-prevention](https://www.niaid.nih.gov/news-events/nih-launches-first-large-trial-long-acting-injectable-drug-hiv-prevention). (accessed 4 September 2017).  
12  
13  
14  
15  
16 46. National Bureau of Statistics, Office of Chief Government Statistician. 2012 Population and  
17 Housing Census: Population Distribution by Administrative Areas. Dar es Salaam:  
18 National Bureau of Statistics, 2013.  
19  
20  
21  
22  
23  
24  
25  
26  
27  
28  
29  
30  
31  
32  
33  
34  
35  
36  
37  
38  
39  
40  
41  
42  
43  
44  
45  
46  
47  
48  
49  
50  
51  
52  
53  
54  
55  
56  
57  
58  
59  
60

1  
2  
3 **Contributions:** DS and TWB conceptualized the study and contributed to the study design. GH  
4 contributed to study design, conducted the analyses, summarized the results in tables and  
5 figures and wrote the first draft of the paper. AM, KFO, IM, PD, NU and EM contributed  
6 substantially to data acquisition. DB and CEO contributed to the study design and  
7 interpretation. All authors contributed to the study design, data interpretation and revisions to  
8 the text, and approved the final text and agreed to be accountable for the work.  
9  
10  
11  
12  
13

14 **Acknowledgements:** We thank the Kinondoni District Medical Officer, bar owners, bar  
15 managers and barmaids for their assistance conducting this study.  
16  
17  
18

19 **Funding:** This study was supported by the National Institute on Aging (grant R01-AI112339).  
20 KFO was supported in part by the National Institute of Allergy and Infectious Disease T32-  
21 AI007535 (PI Seage). CEO was supported in part by the National Institute on Drug Abuse T32-  
22 DA013911 (PI Flanigan) and the National Institute of Mental Health R25-MH083620 (PI Nunn).  
23 TB was supported by the Alexander von Humboldt Foundation through the Alexander von  
24 Humboldt professor award, which is funded by the German Federal Ministry of Education and  
25 Research; the Wellcome Trust; the European Commission; the Clinton Health Access Initiative;  
26 and the National Institutes of Health through the National Institute of Child Health and Human  
27 Development (R01-HD084233), the National Institute on Aging (P01-AG041710), the National  
28 Institute of Allergy and Infectious Diseases (R01-AI124389) and the Fogarty International  
29 Center (D43-TW009775).  
30  
31  
32  
33  
34  
35  
36  
37  
38

39 **Disclaimer:** The funders had no role in study design, data collection and analysis, decision to  
40 publish, or preparation of the manuscript.  
41  
42

43 **Patient consent:** Written informed consent was obtained from all individual participants  
44 included in the study.  
45  
46

47 **Competing interests:** None declared  
48  
49

50 **Data sharing statement:** All unpublished data related to this research project are available  
51 with the authors and can be requested by emailing to [g.harling@ucl.ac.uk](mailto:g.harling@ucl.ac.uk).  
52  
53  
54  
55  
56  
57  
58  
59  
60



## FIGURES AND TABLES

**Table 1: Descriptive statistics for socio-demographic and behavioral risk factors for HIV**

|                                                       | All respondents |               | PrEP question respondents |             |
|-------------------------------------------------------|-----------------|---------------|---------------------------|-------------|
|                                                       | N               |               | N                         |             |
| Age                                                   | 66              | 26 [23 - 30]  | 56                        | 25 [23-29]  |
| Born in Dar es Salaam                                 | 65              | 9%            | 55                        | 9%          |
| Years working in bars                                 | 66              | 2 [0.4 - 4]   | 56                        | 1.8 [0.4-3] |
| Plan to continue bar work                             | 66              | 11%           | 56                        | 9%          |
| Monthly income (USD)                                  | 62              | 91 [68 - 136] | 53                        | 91 [68-136] |
| Ever been pregnant                                    | 66              | 85%           | 56                        | 82%         |
| Of whom, ever had undesired pregnancy                 | 56              | 52%           | 46                        | 54%         |
| Of whom, ever had termination or miscarriage          | 56              | 46%           | 46                        | 46%         |
| Ever had sex with anyone for money                    | 66              | 50%           | 56                        | 54%         |
| Ever had sex with patron for money                    | 66              | 35%           | 56                        | 38%         |
| Of whom, ever had oral sex with patron                | 23              | 70%           | 21                        | 30%         |
| Of whom, Ever had vaginal sex with patron             | 23              | 48%           | 21                        | 67%         |
| Of whom, How often asks patron to use condom †        | 23              | 4 [3 - 4]     | 21                        | 4 [4-4]     |
| Of whom, How often patron asks not to use condom †    | 23              | 2 [1 - 3]     | 21                        | 3 [2-3]     |
| Ever had sex with others for money                    | 66              | 30%           | 21                        | 48%         |
| Number of non-client partners in past 12 months       | 56              | 2 [1 - 3]     | 47                        | 1 [1-3]     |
| Has a primary partner                                 | 66              | 68%           | 56                        | 66%         |
| Of whom, used condom at last sex with primary partner | 44              | 18%           | 37                        | 19%         |
| Currently using male condoms for family planning      | 66              | 36%           | 56                        | 38%         |
| PHQ-9 major depressive symptoms                       | 66              | 20%           | 56                        | 16%         |
| PTSD-IV screen positive                               | 66              | 21%           | 56                        | 23%         |
| Low social support                                    | 66              | 58%           | 56                        | 55%         |
| Ever taken an HIV test                                | 66              | 97%           | 56                        | 96%         |
| Number of HIV tests ever taken                        | 64              | 3 [2 - 5]     | 54                        | 3 [2-5]     |
| Months since last HIV test                            | 64              | 6 [3.5 - 12]  | 54                        | 6 [4-12]    |
| Willing to complete HCT today                         | 66              | 85%           | 56                        | 86%         |

Values are counts (N), proportions or medians and interquartile ranges. USD: United States dollar; PHQ: Patient Health Questionnaire; PTSD: Post-traumatic stress disorder; HCT: HIV counselling and testing. † 5-point scale; higher values indicate greater frequency.



**Table 2: Associations between socio-demographic and behavioral factors and interest in PrEP modalities**

|                                                               | Daily pill  |             | 90-day injectable |                | Vaginal gel  |             | Vaginal ring |            |
|---------------------------------------------------------------|-------------|-------------|-------------------|----------------|--------------|-------------|--------------|------------|
|                                                               | No          | Yes         | No                | Yes            | No           | Yes         | No           | Yes        |
| Very/somewhat interested in modality                          | 30          | 26          | 12                | 44             | 35           | 21          | 50           | 6          |
| Age                                                           | 25 [23-30]  | 25 [23-28]  | 23 [22-28.5]      | 25 [23-29]     | 25 [22-28]   | 25 [23-30]  | 25 [22-29]   | 27 [24-27] |
| Born in Dar es Salaam                                         | 8%          | 10%         | 8%                | 9%             | 9%           | 10%         | 8%           | 17%        |
| Years working in bars                                         | 1.8 [0.4-3] | 1.8 [0.3-3] | 1.5 [0.2-2.5]     | 1.8 [0.5-3]    | 1.5 [0.5-3]  | 2 [0.25-6]  | 1.5 [0.4-3]  | 2 [2-3]    |
| Plan to continue bar work                                     | 8%          | 11%         | 8%                | 10%            | 9%           | 10%         | 11%          | 0%         |
| Monthly income (USD)                                          | 91 [68-136] | 91 [57-148] | 91 [68-136]       | 91 [68-159]    | 102 [80-136] | 91 [55-182] | 91 [68-159]  | 91 [91-91] |
| Ever been pregnant                                            | 88%         | 77%         | 83%               | 82%            | 80%          | 86%         | 82%          | 83%        |
| Of whom, ever had undesired pregnancy                         | 48%         | 61%         | 50%               | 56%            | 64%          | 39%         | 56%          | 40%        |
| Of whom, ever had termination or miscarriage                  | <b>30%</b>  | <b>61%</b>  | 40%               | 47%            | 46%          | 44%         | 46%          | 40%        |
| Ever had sex with anyone for money                            | 46%         | 60%         | 50%               | 55%            | 54%          | 52%         | 56%          | 33%        |
| Ever had sex with patron for money                            | 31%         | 43%         | 25%               | 41%            | 40%          | 33%         | 38%          | 33%        |
| Of whom, ever had oral sex with patron                        | 27%         | 33%         | 33%               | 30%            | 31%          | 29%         | 34%          | 0%         |
| Of whom, Ever had vaginal sex with patron                     | 75%         | 62%         | 100%              | 61%            | 64%          | 71%         | 63%          | 100%       |
| Of whom, How often asks patron to use condom <sup>†</sup>     | 4 [4-4]     | 4 [3-4]     | 4 [4-4]           | 4 [3-4]        | 4 [2-4]      | 4 [4-4]     | 4 [4-4]      | 3.5 [3-4]  |
| Of whom, How often patron asks not to use condom <sup>†</sup> | 1.5 [1-2.5] | 2 [2-3]     | 2 [1-2]           | 2 [1-3]        | 2 [1-3]      | 2 [1-2]     | 2 [1-3]      | 2 [1-3]    |
| Ever had sex with others for money                            | 25%         | 62%         | 33%               | 50%            | 50%          | 43%         | 47%          | 50%        |
| Number of non-client partners in past 12m                     | 2 [1-3]     | 1 [1-3]     | <b>1 [1-1]</b>    | <b>2 [1-3]</b> | 2 [1-3]      | 1 [1-3]     | 1 [1-3]      | 1.5 [1-3]  |
| Has a primary partner                                         | 69%         | 63%         | 75%               | 64%            | 74%          | 52%         | 62%          | 100%       |
| Of whom, used condom at last sex with primary partner         | 11%         | 26%         | 11%               | 21%            | 12%          | 36%         | 16%          | 33%        |
| Currently using male condoms for family planning              | 40%         | 53%         | 40%               | 48%            | 38%          | 60%         | 43%          | 75%        |
| PHQ-9 major depressive symptoms                               | 15%         | 27%         | 8%                | 25%            | 17%          | 29%         | 24%          | 0%         |
| PTSD-IV screen positive                                       | 15%         | 30%         | 8%                | 27%            | 20%          | 29%         | 24%          | 17%        |
| Low social support                                            | 50%         | 60%         | 58%               | 55%            | 54%          | 57%         | 58%          | 33%        |
| Ever taken an HIV test                                        | 100%        | 93%         | 100%              | 95%            | 97%          | 95%         | 96%          | 100%       |
| Number of HIV tests ever taken                                | 3 [2-5]     | 3 [2-5]     | 3 [1.5-5.5]       | 3 [2-5]        | 3 [2-5]      | 3 [2-4]     | 3 [2-5]      | 3.5 [1-5]  |
| Months since last HIV test                                    | 5 [4-10]    | 7 [4-13.5]  | 5 [3.5-9]         | 7 [4-12]       | 6.5 [5-15]   | 5.5 [3.5-7] | 6 [4-12]     | 8.5 [4-11] |
| Willing to complete HCT today                                 | 25 [23-30]  | 25 [23-28]  | 23 [22-28.5]      | 25 [23-29]     | 25 [22-28]   | 25 [23-30]  | 25 [22-29]   | 27 [24-27] |

Values are counts (interest in modality row), proportions or medians and interquartile ranges. USD: United States dollar; FP: Family planning; HCT: HIV counselling and testing. <sup>†</sup> 5-point scale; higher values indicate greater frequency. The two significant differences (at  $\alpha=0.05$ ) between variables based on a  $\chi^2_1$  test for binary factors and Kruskal-Wallis tests for continuous and ordinal factors are shown in bold.

1  
2  
3 **Figure 1: Female bar worker interest in, and ordered preferences for, various**  
4 **PrEP modalities**  
5  
6  
7

8  
9 A. Level of interest in each PrEP modality; B. Ordered preference for each PrEP  
10 modality. Numbers in figures are percentages of all respondents. PrEP: Pre-exposure  
11 prophylaxis.  
12  
13  
14  
15  
16  
17  
18  
19  
20  
21  
22  
23  
24  
25  
26  
27  
28  
29  
30  
31  
32  
33  
34  
35  
36  
37  
38  
39  
40  
41  
42  
43  
44  
45  
46  
47  
48  
49  
50  
51  
52  
53  
54  
55  
56  
57  
58  
59  
60

For peer review only

1  
2  
3  
4  
5  
6  
7  
8  
9  
10  
11  
12  
13  
14  
15  
16  
17  
18  
19  
20  
21  
22  
23  
24  
25  
26  
27  
28  
29  
30  
31  
32  
33  
34  
35  
36  
37  
38  
39  
40  
41  
42  
43  
44  
45  
46  
47  
48  
49  
50  
51  
52  
53  
54  
55  
56  
57  
58  
59  
60

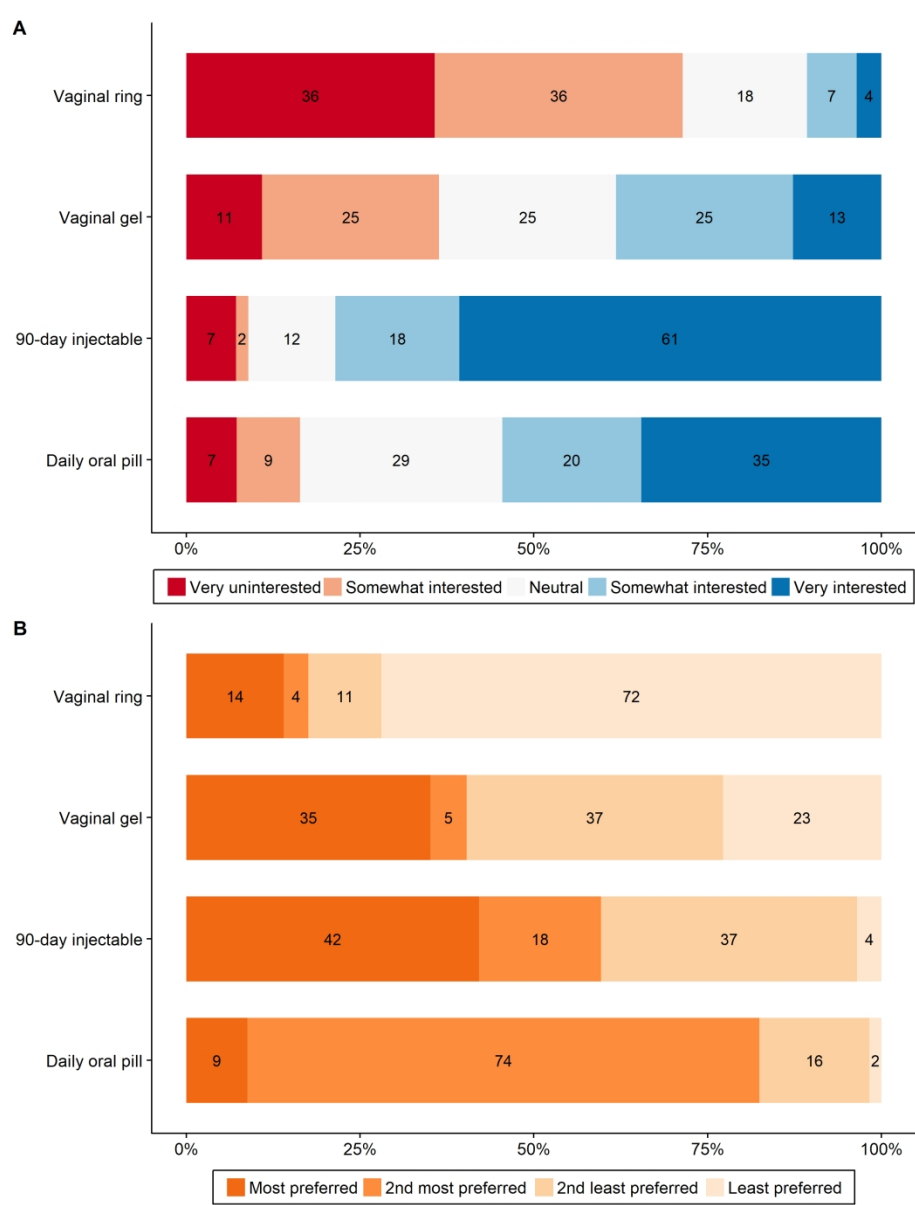

Female bar worker interest in, and ordered preferences for, various PrEP modalities

A. Level of interest in each PrEP modality; B. Ordered preference for each PrEP modality. Numbers in figures are percentages of all respondents. PrEP: Pre-exposure prophylaxis.

**Title:** HIV risk and Pre-exposure Prophylaxis interest among female bar workers in Dar es Salaam: a cross-sectional survey

## Supplementary Materials

### Supplementary Material 1: PrEP questionnaire section

A new method for preventing HIV is called pre-exposure prophylaxis, or PrEP. PrEP is for people who do not have HIV but who are at risk of getting it, to prevent HIV infection. Typically, PrEP is taken as a daily pill to prevent HIV infection

Prior to today, had you ever heard of pre-exposure prophylaxis (PrEP), or a daily pill to prevent HIV infection?

- Yes
- No
- Don't know/not sure
- Prefer not to answer

How interested are you in taking daily PrEP to prevent HIV infection?

- Very interested
- Somewhat interested
- Neutral
- Somewhat uninterested
- Very uninterested
- Don't know
- Prefer not to answer

One version of PrEP is a daily pill taken by mouth; PrEP is most effective when taken every single day. How difficult do you think it would be to take PrEP every single day?

- Very difficult
- Somewhat difficult
- Neither difficult nor easy
- Somewhat easy
- Very easy
- I don't know
- Prefer not to answer

What are some reasons it may be difficult to take daily oral PrEP every single day?

- Difficulty remembering
- Travel/migration
- Alcohol/drug use
- Fear that my spouse/other non-commercial partner might find out
- Fear that other sex workers might find out
- Fear that my clients might find out
- Fear that other people might find out
- Prefer not to answer

If you were to get PrEP, where would you prefer to get PrEP?

- Public facility
- Private facility
- Drug store/pharmacy
- Peer educator
- Other: \_\_\_\_\_
- Prefer not to answer

1  
2  
3 Another form of PrEP that is being tested is an injection, or a shot, every 3 months – instead of a  
4 pill by mouth every day.  
5

6 If found to be effective, how interested would you be in taking injectable PrEP?  
7

- 8
- 9 • Very interested
  - 10 • Somewhat interested
  - 11 • Neutral
  - 12 • Somewhat uninterested
  - 13 • Very uninterested
  - 14 • Don't know
  - 15 • Prefer not to answer

16 How difficult do you think it would be to return for an injection every 3 months?  
17

- 18
- 19 • Very difficult
  - 20 • Somewhat difficult
  - 21 • Neither difficult nor easy
  - 22 • Somewhat easy
  - 23 • Very easy
  - 24 • Don't know
  - 25 • Prefer not to answer

26 A third form of PrEP that is being tested is a gel (like a lubricant) that you insert into your  
27 vagina.  
28

29 If found to be effective, how interested would you be in taking PrEP as a vaginal gel?  
30

- 31
- 32 • Very interested
  - 33 • Somewhat interested
  - 34 • Neutral
  - 35 • Somewhat uninterested
  - 36 • Very uninterested
  - 37 • Don't know
  - 38 • Prefer not to answer

39 How difficult do you think it would be to apply the gel before sex?  
40

- 41
- 42 • Very difficult
  - 43 • Somewhat difficult
  - 44 • Neither difficult nor easy
  - 45 • Somewhat easy
  - 46 • Very easy
  - 47 • Don't know
  - 48 • Prefer not to answer

49 A fourth form of PrEP that is being tested is a vaginal ring that you insert into your vagina once  
50 per month.  
51

52 If found to be effective, how interested would you be in taking PrEP as a vaginal ring?  
53

- 54
- 55 • Very interested
  - 56 • Somewhat interested
  - 57 • Neutral
  - 58 • Somewhat uninterested
  - 59 • Very uninterested
  - 60 • Don't know
  - 61 • Prefer not to answer

52 How difficult do you think it would be to remember to replace the ring each month?  
53

- 54
- 55 • Very difficult
  - 56 • Somewhat difficult
  - 57 • Neither difficult nor easy
  - 58 • Somewhat easy
  - 59 • Very easy
  - 60 • Don't know
  - 61 • Prefer not to answer

1  
2  
3 Of the four ways of taking PrEP, please tell me which you prefer the most and which the least?  
4 (Enter a 1 for the MOST preferred, and a 4 for the LEAST preferred method.)  
5

- 6 \_\_\_ A daily oral pill  
7 \_\_\_ Quarterly (every 3 months) injection/shot  
8 \_\_\_ A gel (like a lubricant) that you insert into your vagina  
9 \_\_\_ A ring that you insert into your vagina  
10  
11  
12  
13  
14  
15  
16  
17  
18  
19  
20  
21  
22  
23  
24  
25  
26  
27  
28  
29  
30  
31  
32  
33  
34  
35  
36  
37  
38  
39  
40  
41  
42  
43  
44  
45  
46  
47  
48  
49  
50  
51  
52  
53  
54  
55  
56  
57  
58  
59  
60

For peer review only

**STROBE 2007 (v4) Statement—Checklist of items that should be included in reports of *cross-sectional studies***

| Section/Topic             | Item # | Recommendation                                                                                                                                                                       | Reported on page # |
|---------------------------|--------|--------------------------------------------------------------------------------------------------------------------------------------------------------------------------------------|--------------------|
| <b>Title and abstract</b> | 1      | (a) Indicate the study’s design with a commonly used term in the title or the abstract                                                                                               | 1                  |
|                           |        | (b) Provide in the abstract an informative and balanced summary of what was done and what was found                                                                                  | 2                  |
| <b>Introduction</b>       |        |                                                                                                                                                                                      |                    |
| Background/rationale      | 2      | Explain the scientific background and rationale for the investigation being reported                                                                                                 | 5-6                |
| Objectives                | 3      | State specific objectives, including any prespecified hypotheses                                                                                                                     | 6                  |
| <b>Methods</b>            |        |                                                                                                                                                                                      |                    |
| Study design              | 4      | Present key elements of study design early in the paper                                                                                                                              | 6-7                |
| Setting                   | 5      | Describe the setting, locations, and relevant dates, including periods of recruitment, exposure, follow-up, and data collection                                                      | 6-7                |
| Participants              | 6      | (a) Give the eligibility criteria, and the sources and methods of selection of participants                                                                                          | 7                  |
| Variables                 | 7      | Clearly define all outcomes, exposures, predictors, potential confounders, and effect modifiers. Give diagnostic criteria, if applicable                                             | 7                  |
| Data sources/ measurement | 8*     | For each variable of interest, give sources of data and details of methods of assessment (measurement). Describe comparability of assessment methods if there is more than one group | 7                  |
| Bias                      | 9      | Describe any efforts to address potential sources of bias                                                                                                                            | 7                  |
| Study size                | 10     | Explain how the study size was arrived at                                                                                                                                            | 7                  |
| Quantitative variables    | 11     | Explain how quantitative variables were handled in the analyses. If applicable, describe which groupings were chosen and why                                                         | 7                  |
| Statistical methods       | 12     | (a) Describe all statistical methods, including those used to control for confounding                                                                                                | 7                  |
|                           |        | (b) Describe any methods used to examine subgroups and interactions                                                                                                                  | 7                  |
|                           |        | (c) Explain how missing data were addressed                                                                                                                                          | n/a                |
|                           |        | (d) If applicable, describe analytical methods taking account of sampling strategy                                                                                                   | n/a                |
|                           |        | (e) Describe any sensitivity analyses                                                                                                                                                | n/a                |
| <b>Results</b>            |        |                                                                                                                                                                                      |                    |

|                          |     |                                                                                                                                                                                                              |             |
|--------------------------|-----|--------------------------------------------------------------------------------------------------------------------------------------------------------------------------------------------------------------|-------------|
| Participants             | 13* | (a) Report numbers of individuals at each stage of study—eg numbers potentially eligible, examined for eligibility, confirmed eligible, included in the study, completing follow-up, and analysed            | 8           |
|                          |     | (b) Give reasons for non-participation at each stage                                                                                                                                                         | n/a         |
|                          |     | (c) Consider use of a flow diagram                                                                                                                                                                           | n/a         |
| Descriptive data         | 14* | (a) Give characteristics of study participants (eg demographic, clinical, social) and information on exposures and potential confounders                                                                     | 8 & Table 1 |
|                          |     | (b) Indicate number of participants with missing data for each variable of interest                                                                                                                          | Table 1     |
| Outcome data             | 15* | Report numbers of outcome events or summary measures                                                                                                                                                         | 8-9         |
| Main results             | 16  | (a) Give unadjusted estimates and, if applicable, confounder-adjusted estimates and their precision (eg, 95% confidence interval). Make clear which confounders were adjusted for and why they were included | 9-10        |
|                          |     | (b) Report category boundaries when continuous variables were categorized                                                                                                                                    | n/a         |
|                          |     | (c) If relevant, consider translating estimates of relative risk into absolute risk for a meaningful time period                                                                                             | n/a         |
| Other analyses           | 17  | Report other analyses done—eg analyses of subgroups and interactions, and sensitivity analyses                                                                                                               | n/a         |
| <b>Discussion</b>        |     |                                                                                                                                                                                                              |             |
| Key results              | 18  | Summarise key results with reference to study objectives                                                                                                                                                     | 10-11       |
| Limitations              | 19  | Discuss limitations of the study, taking into account sources of potential bias or imprecision. Discuss both direction and magnitude of any potential bias                                                   | 11          |
| Interpretation           | 20  | Give a cautious overall interpretation of results considering objectives, limitations, multiplicity of analyses, results from similar studies, and other relevant evidence                                   | 11          |
| Generalisability         | 21  | Discuss the generalisability (external validity) of the study results                                                                                                                                        | 11          |
| <b>Other information</b> |     |                                                                                                                                                                                                              |             |
| Funding                  | 22  | Give the source of funding and the role of the funders for the present study and, if applicable, for the original study on which the present article is based                                                | 16          |

\*Give information separately for cases and controls in case-control studies and, if applicable, for exposed and unexposed groups in cohort and cross-sectional studies.

**Note:** An Explanation and Elaboration article discusses each checklist item and gives methodological background and published examples of transparent reporting. The STROBE checklist is best used in conjunction with this article (freely available on the Web sites of PLoS Medicine at <http://www.plosmedicine.org/>, Annals of Internal Medicine at <http://www.annals.org/>, and Epidemiology at <http://www.epidem.com/>). Information on the STROBE Initiative is available at [www.strobe-statement.org](http://www.strobe-statement.org).



# BMJ Open

## HIV risk and Pre-exposure Prophylaxis interest among female bar workers in Dar es Salaam: a cross-sectional survey

|                                 |                                                                                                                                                                                                                                                                                                                                                                                                                                                                                                                                                                                                                                                                                                                                                                                                                                                                                                                                                                                          |
|---------------------------------|------------------------------------------------------------------------------------------------------------------------------------------------------------------------------------------------------------------------------------------------------------------------------------------------------------------------------------------------------------------------------------------------------------------------------------------------------------------------------------------------------------------------------------------------------------------------------------------------------------------------------------------------------------------------------------------------------------------------------------------------------------------------------------------------------------------------------------------------------------------------------------------------------------------------------------------------------------------------------------------|
| Journal:                        | <i>BMJ Open</i>                                                                                                                                                                                                                                                                                                                                                                                                                                                                                                                                                                                                                                                                                                                                                                                                                                                                                                                                                                          |
| Manuscript ID                   | bmjopen-2018-023272.R2                                                                                                                                                                                                                                                                                                                                                                                                                                                                                                                                                                                                                                                                                                                                                                                                                                                                                                                                                                   |
| Article Type:                   | Research                                                                                                                                                                                                                                                                                                                                                                                                                                                                                                                                                                                                                                                                                                                                                                                                                                                                                                                                                                                 |
| Date Submitted by the Author:   | 31-Jan-2019                                                                                                                                                                                                                                                                                                                                                                                                                                                                                                                                                                                                                                                                                                                                                                                                                                                                                                                                                                              |
| Complete List of Authors:       | Harling, Guy; University College London, Institute for Global Health<br>Muya, Aisa; Management and Development for Health<br>Ortblad, Katrina; University of Washington, International Clinical Research Center<br>Mashasi, Irene; Management and Development for Health<br>Dambach, Peter; UniversitätsKlinikum Heidelberg, Institute of Public Health<br>Ulenga, Nzovu; Management and Development for Health<br>Barnhart, Dale; Harvard University T H Chan School of Public Health, Department of Epidemiology<br>Mboggo, Eric; Management and Development for Health<br>Oldenburg, Catherine; University of California San Francisco, Francis I Proctor Foundation; University of California San Francisco, Departments of Ophthalmology & Epidemiology and Biostatistics<br>Bärnighausen, Till ; UniversitätsKlinikum Heidelberg, Institute of Public Health; Africa Health Research Institute<br>Spiegelman, Donna; Harvard School of Public Health, Epidemiology & Biostatistics |
| <b>Primary Subject Heading</b>: | HIV/AIDS                                                                                                                                                                                                                                                                                                                                                                                                                                                                                                                                                                                                                                                                                                                                                                                                                                                                                                                                                                                 |
| Secondary Subject Heading:      | Epidemiology, Global health, Sexual health                                                                                                                                                                                                                                                                                                                                                                                                                                                                                                                                                                                                                                                                                                                                                                                                                                                                                                                                               |
| Keywords:                       | Female bar workers, Barmaids, Tanzania, Pre-exposure prophylaxis, HIV prevention                                                                                                                                                                                                                                                                                                                                                                                                                                                                                                                                                                                                                                                                                                                                                                                                                                                                                                         |
|                                 |                                                                                                                                                                                                                                                                                                                                                                                                                                                                                                                                                                                                                                                                                                                                                                                                                                                                                                                                                                                          |

SCHOLARONE™  
Manuscripts

**Title:** HIV risk and Pre-exposure Prophylaxis interest among female bar workers in Dar es Salaam: a cross-sectional survey

**Running Head:** HIV risk and PrEP interest in Dar es Salaam barmaids

**Authors:** Guy Harling<sup>1,2,3</sup>, Aisa Muya<sup>4</sup>, Katrina F. Ortblad<sup>5</sup>, Irene Mashasi<sup>4</sup>, Peter Dambach<sup>6</sup>, Nzovu Ulenga<sup>4</sup>, Dale Barnhart<sup>2</sup>, Eric Mboggo<sup>4</sup>, Catherine E. Oldenburg<sup>7,8,9</sup>, Till Bärnighausen<sup>3,5,6,10</sup>, Donna Spiegelman<sup>2,11,11</sup>

**Author affiliations:**

1. Institute for Global Health, University College London, London, UK
2. Department of Epidemiology, Harvard T.H. Chan School of Public Health, Boston, MA
3. Africa Health Research Institute, KwaZulu-Natal, South Africa
4. Management and Development for Health, Dar es Salaam, Tanzania
5. International Clinical Research Center, University of Washington, Seattle, USA
6. Heidelberg Institute of Global Health (HIGH), University of Heidelberg, Heidelberg, Germany
7. Francis I. Proctor Foundation, University of California, San Francisco, CA
8. Department of Ophthalmology, University of California, San Francisco, CA
9. Department of Epidemiology and Biostatistics, University of California, San Francisco, CA
10. Department of Global Health and Population, Harvard T.H. Chan School of Public Health, Boston, MA
11. Departments of Biostatistics and Nutrition, Harvard T.H. Chan School of Public Health, Boston, MA

**Address for correspondence:** Guy Harling. Institute for Global Health, University College London, Mortimer Market Centre, London, WC1E 6JB. [g.harling@ucl.ac.uk](mailto:g.harling@ucl.ac.uk)

## ABSTRACT

**Objective:** Female bar workers (FBW) in East Africa often conduct sex work to supplement their incomes, and may be vulnerable to HIV acquisition. Pre-exposure prophylaxis (PrEP) offers protection against HIV acquisition. However, there is little research on FBW's sexual health. Our objective was to determine HIV risk behaviors and interest in PrEP among FBW in the largest city in East Africa.

**Design:** Cross-sectional survey covering respondents' work and personal lives, including social and behavioral risk factors for HIV. The survey aimed to determine the feasibility of working with FBW and HIV prevalence estimates. Those who did not report being HIV-positive were asked about their knowledge of and interest in PrEP. All women were offered free on-site HIV testing and counselling (HTC).

**Setting:** Eight randomly selected workplaces, i.e. bars, in Kinondoni district, Dar es Salaam (DSM).

**Participants:** 66 FBW ( $\geq 18$  years) selected at random from all women working in selected bars on the day of visit.

**Results:** Half of respondents reported having had sex for money: 20% with bar clients only, 15% with other men only and 15% with both. Almost all (98%) reported  $\geq 1$  non-commercial partners in the past 12 months; only 30% reported using condoms with these partners. 85% of respondents had ever been pregnant; 44% had had an unintended pregnancy. Only 5% of respondents had ever heard of PrEP. However, 54% were somewhat/very interested in daily-pill PrEP and 79% were somewhat/very interested in long-acting injectable PrEP. When asked to rank modalities, long-acting injectable PrEP was the most-preferred. Seven percent of the 56 respondents who completed HTC tested HIV-positive.

1  
2  
3 **Conclusions:** FBW in DSM have elevated risk factors for HIV acquisition, and PrEP appears  
4 highly acceptable. Studies developing PrEP delivery models and assessing PrEP initiation and  
5 adherence in FBW appear warranted.  
6  
7  
8  
9

10  
11  
12  
13  
14 **Keywords:** Female bar workers; Barmaids; Tanzania; Pre-exposure prophylaxis; HIV  
15 prevention  
16  
17  
18  
19  
20  
21  
22  
23  
24  
25  
26  
27  
28  
29  
30  
31  
32  
33  
34  
35  
36  
37  
38  
39  
40  
41  
42  
43  
44  
45  
46  
47  
48  
49  
50  
51  
52  
53  
54  
55  
56  
57  
58  
59  
60

For peer review only

## STRENGTHS AND LIMITATIONS OF THIS STUDY

- The study population was selected at random from among all female bar workers in one of the three districts of the city of Dar es Salaam.
- HIV serostatus was evaluated using a rapid diagnostic test to avoid differential or non-differential misreporting.
- The sample is relatively small, potentially limiting power to see significant differences within subgroups, but can potentially motivate for studies designing and evaluating PrEP delivery models in this population.
- The sensitive nature of many of the HIV risk factors considered, and the self-report methods employed by the survey, may have led to underreporting of risk behaviours.
- It is unclear how far the findings of this work can be generalized geographically.

## INTRODUCTION

Female sex workers (FSW), i.e. women who receive money or other goods in exchange for sexual services, are a key population for the HIV epidemic in sub-Saharan Africa (SSA). These women are at especially high risk of acquiring and transmitting HIV and other sexually transmitted infections (STI).<sup>1</sup> There is substantial research on how sex workers (SW) contribute to,<sup>2</sup> and are impacted by,<sup>3</sup> the HIV epidemic in SSA.

Sex workers are sometimes divided into 'direct' sex workers for whom it is a primary profession, and 'indirect' sex workers, for whom it is a supplementary source of income.<sup>4</sup>

Indirect sex workers may be particularly important for HIV epidemics if they do not self-identify as sex workers, and thus are not reached by or do not access HIV prevention services such as those targeting direct FSW. In East Africa, female bar workers (FBW), women who either sell or deliver drinks to customers in commercial establishments, often act as indirect FSW.

FBW, or barmaids, often do not self-identify as FSW,<sup>5 6</sup> and, in contrast to bar-based direct FSW, are employed by bars to provide non-sexual services. However, past quantitative research has shown that a substantial minority of FBW (35-45%) have sex in return for money, often with bar clients.<sup>7 8</sup> FBW are often stigmatized and considered by others to be FSW.<sup>9 10</sup> Qualitative work suggests FBW have limited ability to protect themselves against STIs and other adverse consequences of sex work, notably when negotiating condom use.<sup>11-13</sup> While precise numbers are hard to obtain, FBWs likely comprise a large proportion of the 'accommodation and food service activities' employment category, which accounted for 6.5% of all employed Tanzanian women aged >15 in 2014,<sup>14</sup> and it has been claimed that FBWs are the largest single employment group in Tanzania.<sup>15</sup>

1  
2  
3 There is substantial evidence – both direct and indirect – for structural, behavioural and  
4  
5 biomedical interventions that should be able to reduce HIV acquisition and transmission  
6  
7 among FSW.<sup>16</sup> Structural approaches include community mobilization, advocacy and social and  
8  
9 economic empowerment alongside anti-discrimination policies including legal protection.  
10  
11 Behavioural approaches include peer and community-based behaviour change, condom  
12  
13 provision. However, many of these interventions are highly context-specific and have proven  
14  
15 difficult to implement consistently.<sup>17</sup> Biomedical interventions may be more easily  
16  
17 implemented in a wide range of settings. Proven biomedical approaches for FSW include FSW-  
18  
19 friendly provision of services such as voluntary testing, linkage to care and antiretroviral  
20  
21 treatment – including prevention of mother-to-child transmission and post-exposure  
22  
23 prophylaxis. There is no evidence at present as to how FSW-applicable interventions affect  
24  
25  
26  
27  
28  
29  
30  
31  
32  
33  
34  
35  
36  
37  
38  
39  
40  
41  
42  
43  
44  
45  
46  
47  
48  
49  
50  
51  
52  
53  
54  
55  
56  
57  
58  
59  
60  
FBWs.

32  
33 Pre-exposure prophylaxis (PrEP) is an important biomedical HIV prevention tool, proven to  
34  
35 substantially prevent HIV acquisition when taken as prescribed.<sup>18 19</sup> There are several planned  
36  
37 and ongoing PrEP demonstration projects in Africa.<sup>20 21</sup> However, previous PrEP studies have  
38  
39 found variable adherence.<sup>22</sup> Few PrEP trials have explicitly included FSW in their inclusion  
40  
41 criteria – although some included proportions of unmarried women with multiple partners  
42  
43 who reported histories of transactional sex<sup>16</sup> – and to our knowledge none have targeted FBW.  
44  
45 Evidence from FSW from South Africa,<sup>23</sup> Kenya<sup>24</sup> and Zimbabwe<sup>25</sup> points to variable levels of  
46  
47 uptake but rapidly declining retention of FSW on daily pill-based PrEP. Most published PrEP  
48  
49 studies have focused on daily pill-based PrEP, although one study showed effectiveness for on-  
50  
51 demand pills among men-who-have-sex-with-men (MSM).<sup>26</sup> However, other prevention  
52  
53 modalities have been considered, including long-acting injectables,<sup>27 28</sup> vaginal gels<sup>29</sup> and  
54  
55  
56  
57  
58  
59  
60  
vaginal rings.<sup>30</sup>

1  
2  
3 The World Health Organization (WHO) recommends PrEP for populations with an annual risk  
4 of HIV acquisition greater than 3%,<sup>31</sup> and as such it is likely to be a key intervention for  
5 reducing HIV among FSW internationally.<sup>32</sup> Several countries in Africa with generalized  
6 epidemics have included FSW among the key populations eligible for PrEP,<sup>33-35</sup> but few if any  
7 had begun widespread implementation for FSW by mid-2017. Past research has shown high  
8 acceptability of daily-pill PrEP amongst FSW hypothetically in a range of settings,<sup>36</sup> and in  
9 practice in Kenya.<sup>37</sup> While FBW acquisition risk may be lower on average than direct sex  
10 workers, it may well be that they meet the WHO criterion for PrEP.  
11  
12

13  
14  
15  
16  
17  
18  
19  
20  
21  
22  
23 At the time of this study, PrEP was not available anywhere within Tanzania. Two assessments  
24 of interest and barriers to PrEP amongst adolescent girls and young women conducted in 2017  
25 and found high interest but concerns around cost, side-effects and stigma.<sup>38 39</sup> As part of one of  
26 these studies, healthcare providers were largely supportive of PrEP provision, although they  
27 were concerned about behavioural disinhibition and work overload.<sup>40</sup> Evidence specifically on  
28 FSW is not currently available.  
29  
30  
31  
32  
33  
34  
35  
36

37  
38 Although many FBW also act as FSW, there is limited evidence on how much risky sexual  
39 behaviour FBW engage in. To our knowledge, there is no research on the acceptability of PrEP  
40 amongst FBW. We therefore analyzed data from a feasibility study measuring HIV prevalence,  
41 HIV-related risk factors, and initial interest in and acceptability of PrEP amongst FBW in Dar es  
42 Salaam municipality (DSM), Tanzania, the largest city in eastern Africa.  
43  
44  
45  
46  
47  
48  
49  
50  
51  
52

## 53 **METHODS**

54  
55  
56 We conducted a cross-sectional study using a two-stage sampling method in January 2017.

57  
58  
59 This study was a feasibility study whose primary aim was to determine the feasibility of  
60



1  
2  
3 working with FBW in Dar es Salaam, and to provide parameter estimates for HIV prevalence  
4 and intra-cluster correlation coefficients, to inform a subsequent larger study. The larger study  
5 was ultimately judged infeasible based on the HIV prevalence measured in this study. We first  
6 randomly selected eight bars from a sampling frame listing all licensed premises in Kinondoni  
7 district, DSM (one of the three districts in the municipality). We repeatedly sampled without  
8 replacement first a page number and then line number from the listing. Our work was a  
9 feasibility study for a larger study, and thus no formal power calculation was used to establish  
10 sample size. However, our sample of 56 individuals with HIV tests gave us 66% power to  
11 provide 95% confidence intervals of +/- 10% around an expected HIV prevalence estimate of  
12 20%.

13  
14  
15  
16  
17  
18  
19  
20  
21  
22  
23  
24  
25  
26  
27  
28  
29  
30  
31  
32  
33  
34  
35  
36  
37  
38  
39  
40  
41  
42  
43  
44  
45  
46  
47  
48  
49  
50  
51  
52  
53  
54  
55  
56  
57  
58  
59  
60

The field team visited each bar at a time arranged by telephone with each bar's licensee. After explaining the study first to the bar manager and then to all FBW present, FBW were invited to participate in a computer-assisted personal interview (CAPI), and then complete HIV testing and counselling (HTC). Study inclusion criteria were being 18 years or older and working as a FBW at the time of study visit. Between 6 and 12 FBW – depending on the length of each interview – were chosen at random within each bar based on a list drawn up by the bar manager at first bar entry. All interviews were conducted in a three-wheel taxi (*bajaji*) with closed sides parked close to the bar, to ensure privacy.

The CAPI covered several topics, including: women's socio-demographics; their work history; their sexual history, including past STI diagnoses and HIV testing; their knowledge of HIV prevention modalities; substance use; and psychological wellbeing (depression, post-traumatic stress disorder (PTSD) and generalized social support). For depression we asked the PHQ-9 scale, which has previously been used with Tanzanian women living with HIV.<sup>41</sup> We assessed PTSD using the PTSD-IV screening tool. Generalized social support was measured using a 10-

1  
2  
3 item version of the Duke-UNC Functional Social Support Questionnaire (FSSQ), adapted to  
4  
5 include instrumental support and validated for Tanzanian women.<sup>42</sup> Potential responses to  
6  
7 each FSSQ question were: “as much as I would like” (4); “less than I would like” (3); “much less  
8  
9 than I would like” (2); and “never” (1). A mean score <3 is considered as ‘low social support’.

10  
11  
12  
13 Respondents were asked if they had ever heard of PrEP or a daily pill to prevent HIV infection.  
14  
15 Then, following a brief description of each modality, they were asked how interested they were  
16  
17 in taking PrEP as: (i) a daily pill; (ii) an injection every 3 months; (iii) a pericoital vaginal gel;  
18  
19 (iv) a monthly vaginal ring. For each PrEP modality interest was gauged on a five-point scale:  
20  
21 very interested; somewhat interested; neutral; somewhat uninterested; very uninterested.  
22  
23 Finally, they were asked to rank the four modalities from most to least preferred. All PrEP  
24  
25 questions are presented in Supplementary Material 1. Questions about PrEP were not asked to  
26  
27 those who self-reported having previously tested HIV-positive, and due to a coding error were  
28  
29 not asked at the first bar visited. Anyone testing positive for HIV and not already linked to care  
30  
31 was referred to their clinic of choice.  
32  
33  
34  
35  
36

37  
38 In this analysis, we provide descriptive statistics for various potential risk and protective  
39  
40 factors for HIV acquisition. We then assess bivariate associations between these factors and  
41  
42 interest in various modalities of PrEP, using  $\chi^2$  tests for binary variables and Kruskal-Wallis  
43  
44 tests for continuous and ordinal variables. We dichotomized PrEP interest as either positive  
45  
46 (very interested or somewhat interested) or not (neutral, somewhat uninterested or very  
47  
48 uninterested), in order to evaluate which factors were and were not associated with active  
49  
50 interest in PrEP. HIV status was measured based on HIV test result.  
51  
52  
53

54  
55 The study received ethical approval from Harvard T.H. Chan School of Public Health and the  
56  
57 Tanzanian National Institute for Medical Research. Written informed consent was obtained  
58  
59 from each participant.  
60

## Participant and Public Involvement

Neither patients nor public were directly involved in the development, design or recruitment of the study. HIV test results were provided to participants at point of testing; results will not otherwise be disseminated directly to study participants.

## RESULTS

### Participant characteristics

Sixty-six FBW were invited to participate in the study and all agreed (Table 1). Most of the women were in their twenties (median age 26, interquartile range [IQR]: 23-30). Almost all the women (91%) were born outside of DSM. FBW had been working as barmaids for a median of two years (IQR: 4 months to 4 years). Only 9% FBW planned to continue working as FBW, all but one of whom planned to stop within two years. FBW reported a median monthly income of \$91 (IQR: \$68-136). Most FBW (85%) had been pregnant in the past, 44% reported having had an unintended pregnancy and 39% a miscarriage or termination. 71% of FBW had a living child at the time of interview (median 1, IQR: 1-2).

Psychometric properties for the wellbeing measures were acceptable: Cronbach's alpha was 0.71 for PHQ-9, 0.71 for the PTSD-IV and 0.85 for FSSQ. Based on standard score summation, 20% of respondents showed depressive symptoms, while 21% affirmed 3 or 4 PTSD-IV questions and thus screened positive for possible PTSD, and 58% had a mean FSSQ score <3 and thus had low social support.

Almost all (96%) of FBW had previously taken an HIV test (median 3 tests in lifetime, IQR: 2-5), with 53% having tested within the past six months and 78% within the past 12. Three women

1  
2  
3 (5%) had previously tested positive for HIV. Fifty-six FBW (85%) consented to test for HIV and  
4  
5 four of these (7%) tested positive; only one had not previously received a positive test result.  
6  
7

### 8 **HIV acquisition risk factors**

9  
10  
11 Exactly half of FBW reported ever having had sex with someone in return for money: 20% only  
12  
13 with bar clients; 15% only with other men; and 15% with both. Of the 35% FBW reporting sex  
14  
15 with bar clients, 74% reported asking clients to use condoms often or always. A majority  
16  
17 (52%) reported that clients sometimes or often asked not to use condoms, but only 8% of FBW  
18  
19 reported often or always agreeing not to use condoms in situations where they want to use a  
20  
21 condom but their clients has asked not to. FBW also reported a median of two non-commercial  
22  
23 partners in the past 12 months (IQR: 1-3, maximum 8). 68% of FBW reported having a primary  
24  
25 partner, and only 18% of these women reported using a condom at last sex with this partner.  
26  
27 Only 30% of FBW reported using male or female condoms as a family planning method, while  
28  
29 another 24% reported using pills, injectables or implants. Almost half (47%) of respondents  
30  
31 believed they were either at great risk of, or certain to become infected with, HIV.  
32  
33  
34  
35  
36  
37

### 38 **PrEP interest**

39  
40  
41 Questions about PrEP were asked to 56 women (3 had previously tested HIV positive, 7 were  
42  
43 in the first bar visited). Only 5% of these FBW had ever heard of PrEP, however 54% were  
44  
45 either somewhat or very interested in a daily pill that protected against HIV infection, and only  
46  
47 16% were uninterested (Figure 1A). When asked about other potential treatment modalities,  
48  
49 79% of FBW were interested or very interested in long-acting injectable PrEP, 38% in vaginal  
50  
51 gel PrEP and only 11% in monthly vaginal ring PrEP. Only one women was somewhat or very  
52  
53 uninterested in any type of PrEP. Level of interest in daily-pill PrEP was statistically  
54  
55 significantly correlated with interest in long-acting injectable PrEP ( $\rho = 0.40$ ,  $p=0.003$ ), but not  
56  
57  
58  
59  
60

1  
2  
3 with either vaginal modality. When asked to rank the four modalities, the most preferred  
4  
5 method was long-acting injectable PrEP, although 82% of women ranked daily-pill PrEP as  
6  
7 either their first or second preference (Figure 1B). Restricting our sample to all respondents  
8  
9 with at least 'neutral' (96%) or at least 'somewhat interested' (86%) responses for at least one  
10  
11 PrEP modality did not change these patterns.  
12  
13

### 14 15 **Correlates of PrEP interest**

16  
17  
18 Associations between interest in each PrEP modality and the range of HIV risk factors are  
19  
20 presented in Table 2. There was no significant difference in interest level (very/somewhat  
21  
22 interested vs. neutral or somewhat/very uninterested) in daily-pill PrEP for those who did/did  
23  
24 not report any sex for money (60% vs. 46%,  $p=0.30$ ). This pattern was similar for those who  
25  
26 did/did not report sex for money with bar clients (62% vs 49%,  $p=0.33$ ) and those who  
27  
28 did/did not report sex for money with others (59% vs 51%,  $p=0.60$ ). Interest in long-acting  
29  
30 injectable PrEP was similarly not significantly associated with having had sex in return for  
31  
32 money (any sex for money: 80% vs 77%,  $p=0.78$ ; sex for money with bar clients: 86% vs. 74%,  
33  
34  $p=0.31$ ; sex for money with non-bar clients: 76% vs 79%,  $p=0.80$ ). The only socio-demographic  
35  
36 or behavioral factor associated with significantly higher interest in daily-pill PrEP was a  
37  
38 history of miscarriage or termination (61% vs. 39%,  $p=0.04$ ). The only factor associated with  
39  
40 significantly higher interest in long-acting injectable PrEP was number of non-client partners  
41  
42 in the past 12 months (interest: median 2, IQR: 1-3; no interest: median 1, IQR: 1-1;  $p=0.03$ ).  
43  
44  
45 Willingness to consent for an HIV test was not significantly associated with interest in daily-pill  
46  
47 PrEP (54% vs 50%,  $p=0.83$ ).  
48  
49  
50  
51  
52  
53  
54  
55  
56  
57  
58  
59  
60

## DISCUSSION

In a random sample of 66 FBW from bars in DSM, HIV prevalence was low (similar to the 7% prevalence for 25-29 year old women nationally, and 8% for 15-49 year old women in DSM, in 2011-12, the most-recent nationally representative survey<sup>43</sup>). However, risk factors for HIV acquisition were substantial – including multiple partners, moderate to low condom use, and substantial levels of sex for money. The proportion of FBW reporting sex for money was similar to earlier quantitative studies.<sup>7 8</sup>

Awareness of PrEP for HIV prevention was very low but interest in PrEP, particularly for daily pills and long-acting injectables, was high. Both these modalities are likely to be recognizable to women in Tanzania since family planning options have similar modes of delivery, e.g. daily contraceptive pills, injectable Depo-Provera and implanted Nur-Isterate. Greater interest in long-acting injectables may also reflect the difficulties of taking daily pills for these working women, and of applying gels prior to sex when timing of sex acts is unpredictable and sometimes not chosen by them. These findings thus resonate with those of earlier work in other sub-Saharan African settings with FSW, which found limited retention on daily pill-based PrEP.<sup>23-25</sup>

While many of differences in PrEP interest were not significant in this small sample (and none remain significant if we adjust for multiple testing using the Holm-Bonferroni or any other method), respondents who reported having sex for money (either with bar clients or others), those who had had a miscarriage or abortion and those with more non-client partners all reported greater interest in PrEP. This pattern of findings, if reproduced in other data, would suggest that those FBW with a higher risk profile for sexually transmitted diseases have a rationally greater interest in PrEP. It was also notable that PrEP interest was similar for those

1  
2  
3 having sex either with bar clients or with others; if efforts are made to determine which FBWs  
4  
5 are having sex for money, inquiries should not be limited to bar patrons.  
6  
7

8  
9 This study highlights that FBW in Dar are at substantial risk for HIV acquisition, that many are  
10  
11 aware that they are at substantial risk and following discussion many are interested PrEP.  
12

13  
14 However, this is only the first stage of the PrEP care continuum,<sup>44</sup> FBW will additionally need  
15  
16 assistance in accessing PrEP and remaining in care. Both of these stages are likely to be  
17  
18 hampered by the stigma and fluidity of life situation that working as an FBW can bring.  
19

20  
21 While no PrEP is currently available to Tanzanian women, daily-pill PrEP demonstration trials  
22  
23 will begin in key Tanzanian populations in 2018 and long-acting injectable PrEP has reached  
24  
25 phase-III trials elsewhere through HPTN-084.<sup>45</sup> Successful PrEP strategies for FBW will require  
26  
27 tailored PrEP programming for such women, mostly likely including clinical care provided  
28  
29 outside standard clinics. One important option here might be workplace-based service  
30  
31 provision – since the bar location forms a multi-year basis for work for the majority of  
32  
33 respondents.  
34  
35  
36

### 37 38 **Strengths and limitations** 39

40  
41 This study provides a first insight into the HIV serostatus and PrEP interest of FBW in DSM.  
42  
43 While the sample in this study is small, it was a random sample drawn from a full enumeration  
44  
45 of all licensed premises (n>2500) in Kinondoni district, an area with a population of over  
46  
47 1,750,000 inhabitants in 2012,<sup>46</sup> and then a full enumeration of all FBW working in each bar at  
48  
49 the time of first visit. Nevertheless, it is possible that the sample of women drawn differs on  
50  
51 some characteristics from other FBW in Kinondoni. Furthermore, our small sample size means  
52  
53 that we cannot rule out some substantial but not significant associations in fact reflecting true  
54  
55 associations that this study lacks the power to confirm. Further analysis with additional FBWs  
56  
57  
58  
59  
60

1  
2  
3 would allow the separation of truly null associations from underpowered analyses. Similarly,  
4  
5 we are not able to conduct multivariable analysis in this dataset, something that would be  
6  
7 important in follow-up work.  
8  
9

10  
11 Caution is needed in generalizing beyond Kinondoni to the rest of DSM, as well as to other  
12  
13 areas of Tanzania and East Africa. However, even should the results only be applicable within  
14  
15 Kinondoni or DSM, our results suggest that a very large number of FBWs in this region are at  
16  
17 risk of HIV acquisition and local interventions may be warranted. Additionally, since many of  
18  
19 the questions asked were sensitive ones, and the responses self-reported through face-to-face  
20  
21 interviews, FBW may have underreported some risk behaviours. The potential for social  
22  
23 desirability bias to affect questions about PrEP was lessened by the very low baseline  
24  
25 awareness of this HIV prevention option.  
26  
27  
28  
29  
30  
31  
32

### 33 **CONCLUSIONS**

34  
35  
36  
37 Based on these initial data, FBW are likely to be a key population for HIV prevention efforts,  
38  
39 including PrEP, to protect both themselves and their partners from acquiring HIV. PrEP seems  
40  
41 acceptable to this sample of FBW – who commonly engaged in unprotected transactional sex  
42  
43 with clients, but planned to discontinue sex work in the near future.  
44  
45  
46

47 This study also provided evidence of the feasibility of contacting FBW at their workplaces.  
48  
49 Nevertheless, further information is needed on both the best design for delivering PrEP and  
50  
51 supporting HIV-related health services to this population and the effectiveness of different  
52  
53 PrEP models in attracting FBW to PrEP and ensuring continued PrEP utilization throughout  
54  
55 periods of high HIV acquisition risk.  
56  
57  
58  
59  
60



## REFERENCES

1. Baral S, Beyrer C, Muessig K, et al. Burden of HIV among female sex workers in low-income and middle-income countries: a systematic review and meta-analysis. *Lancet Infect Dis* 2012;12(7):538-49.
2. Gouws E, Cuchi P. Focusing the HIV response through estimating the major modes of HIV transmission: a multi-country analysis. *Sex Transm Infect* 2012;88(Suppl 2):i76-i85.
3. Shannon K, Strathdee SA, Goldenberg SM, et al. Global epidemiology of HIV among female sex workers: influence of structural determinants. *Lancet* 2015;385(9962):55-71.
4. Harcourt C, Donovan B. The many faces of sex work. *Sex Transm Infect* 2005;81(3):201-06.
5. Sori AT. Poverty, sexual experience and HIV vulnerability risks: evidence from Addis Ababa, Ethiopia. *J Biosoc Sci* 2012;44(6):677-701.
6. Rosenheck R, Ngilangwa D, Manongi R, Kapiga S. Treatment-seeking behavior for sexually transmitted infections in a high-risk population. *AIDS Care* 2010;22(11):1350-58.
7. Ao TT, Sam NE, Masenga EJ, Seage III GR, Kapiga SH. Human immunodeficiency virus type 1 among bar and hotel workers in northern Tanzania: the role of alcohol, sexual behavior, and herpes simplex virus type 2. *Sex Transm Dis* 2006;33(3):163-69.
8. Riedner G, Rusizoka M, Hoffmann O, et al. Baseline survey of sexually transmitted infections in a cohort of female bar workers in Mbeya Region, Tanzania. *Sex Transm Infect* 2003;79(5):382-87.
9. van Blerk L. Negotiating boundaries: the sex work identities of 'bar girls' in Nazareth, Ethiopia. *Gender, Place and Culture* 2011;18(02):217-33.
10. Kerrigan D, Mbwambo J, Likindikoki S, et al. Project Shikamana: Baseline Findings From a Community Empowerment-Based Combination HIV Prevention Trial Among Female Sex Workers in Iringa, Tanzania. *J Acquir Immune Defic Syndr* 2017;74(Suppl 1):S60.
11. Beckham S. "Like Any Other Woman"? Pregnancy, Motherhood, and HIV among Sex Workers in Southern Tanzania. Johns Hopkins University, 2013.

- 1  
2  
3 12. Talle A. Bar workers at the border. In: Klepp K-I, Biswalo PM, Talle A, eds. Young people at  
4 risk: fighting AIDS in northern Tanzania. Oslo, Norway: Scandinavian University Press,  
5 1995:18-30.  
6  
7
- 8  
9 13. Van Blerk L. Poverty, migration and sex work: youth transitions in Ethiopia. *Area*  
10 2008;40(2):245-53.  
11  
12
- 13  
14 14. National Bureau of Statistics (NBS) [Tanzania]. Tanzania Integrated Labour Force Survey  
15 2014. Dar es Salaam: NBS,, 2014.  
16  
17
- 18  
19 15. Akarro RR. Some factors associated with condom use among bar maids in Tanzania. *J Biosoc*  
20 *Sci* 2009;41(01):125-37.  
21  
22
- 23  
24 16. Bekker L-G, Johnson L, Cowan F, et al. Combination HIV prevention for female sex workers:  
25 what is the evidence? *Lancet* 2015;385(9962):72-87.  
26  
27
- 28  
29 17. Iskarpatyoti BS, Lebov J, Hart L, Thomas J, Mandal M. Evaluations of Structural  
30 Interventions for HIV Prevention: A Review of Approaches and Methods. *AIDS Behav*  
31 2018;22(4):1253-64.  
32  
33
- 34  
35 18. Baeten JM, Donnell D, Ndase P, et al. Antiretroviral prophylaxis for HIV prevention in  
36 heterosexual men and women. *N Engl J Med* 2012;367(5):399-410.  
37  
38
- 39  
40 19. Thigpen MC, Kebaabetswe PM, Paxton LA, et al. Antiretroviral preexposure prophylaxis for  
41 heterosexual HIV transmission in Botswana. *N Engl J Med* 2012;367(5):423-34.  
42  
43
- 44  
45 20. AVAC. HIV Prevention Research & Development Database. 10 April 2017 2016.  
46 <http://www.avac.org/pxrd>. (accessed 22 August 2017).  
47  
48
- 49  
50 21. Cowan F, Delany-Moretlwe S, Sanders EJ, et al. PrEP implementation research in Africa:  
51 what is new? *J Int AIDS Soc* 2016;19(Suppl 6):21101.  
52  
53
- 54  
55 22. Van der Straten A, Van Damme L, Haberer JE, Bangsberg DR. Unraveling the divergent  
56 results of pre-exposure prophylaxis trials for HIV prevention. *AIDS* 2012;26(7):F13-F19.  
57  
58
- 59  
60 23. Eakle R, Gomez GB, Mbogua J, et al. Treatment And Prevention for Female Sex Workers in  
South Africa: First-year Results for the TAPS Demonstration Project. HIV Research for  
Prevention. Chicago, IL, 2016.

- 1  
2  
3 24. Kyongo J, Kiragu M, Nduta S, et al. Oral PrEP for HIV Prevention: Early Lessons from a PrEP  
4 Demonstration Project in Kenya. HIV Research for Prevention. Chicago, IL, 2016.  
5  
6  
7  
8 25. Cowan FM, Davey C, Fearon E, et al. Targeted combination prevention to support female sex  
9 workers in Zimbabwe accessing and adhering to antiretrovirals for treatment and  
10 prevention of HIV (SAPPH-IRe): a cluster-randomised trial. *The lancet HIV*  
11 2018;5(8):e417-e26.  
12  
13  
14  
15 26. Molina J-M, Capitant C, Spire B, et al. On-demand preexposure prophylaxis in men at high  
16 risk for HIV-1 infection. *N Engl J Med* 2015;373(23):2237-46.  
17  
18  
19  
20 27. Landovitz RJ, Kofron R, McCauley M. The Promise and Pitfalls of Long Acting Injectable  
21 Agents for HIV Prevention. *Curr Opin HIV AIDS* 2016;11(1):122.  
22  
23  
24  
25 28. Margolis DA, Gonzalez-Garcia J, Stellbrink H-J, et al. Long-acting intramuscular cabotegravir  
26 and rilpivirine in adults with HIV-1 infection (LATTE-2): 96-week results of a  
27 randomised, open-label, phase 2b, non-inferiority trial. *Lancet* 2017.  
28  
29  
30  
31 29. Karim QA, Karim SSA, Frohlich JA, et al. Effectiveness and safety of tenofovir gel, an  
32 antiretroviral microbicide, for the prevention of HIV infection in women. *Science*  
33 2010;329(5996):1168-74.  
34  
35  
36  
37 30. Baeten JM, Palanee-Phillips T, Brown ER, et al. Use of a vaginal ring containing dapivirine  
38 for HIV-1 prevention in women. *N Engl J Med* 2016;375(22):2121-32.  
39  
40  
41  
42 31. World Health Organization. *Consolidated guidelines on the use of antiretroviral drugs for*  
43 *treating and preventing HIV infection: recommendations for a public health approach.*  
44 Geneva: World Health Organization, 2016.  
45  
46  
47  
48 32. Beyrer C, Crago A-L, Bekker L-G, et al. An action agenda for HIV and sex workers. *Lancet*  
49 2015;385(9964):287-301.  
50  
51  
52  
53 33. South African National AIDS Council (SANAC). The South African National Sex Worker HIV  
54 Plan 2016-2019. Pretoria, South Africa: SANAC, 2016.  
55  
56  
57 34. National AIDS & STI Control Programme (NASCOP). Framework for the Implementation of  
58 Pre-exposure Prophylaxis of HIV in Kenya. Nairobi, Kenya: NASCOP, 2017.  
59  
60

- 1  
2  
3 35. Botswana Ministry of Health. Handbook of the Botswana 2016 integrated HIV clinical care  
4 guidelines. Gabarone, Botswana: Botswana Ministry of Health, 2016.  
5  
6  
7  
8 36. Koechlin FM, Fonner VA, Dalglish SL, et al. Values and preferences on the use of oral pre-  
9 exposure prophylaxis (PrEP) for HIV prevention among multiple populations: a  
10 systematic review of the literature. *AIDS Behav* 2017;21(5):1325-35.  
11  
12  
13  
14 37. Van der Elst EM, Mbogua J, Operario D, et al. High acceptability of HIV pre-exposure  
15 prophylaxis but challenges in adherence and use: qualitative insights from a phase I trial  
16 of intermittent and daily PrEP in at-risk populations in Kenya. *AIDS Behav*  
17 2013;17(6):2162-72.  
18  
19  
20  
21  
22 38. Population Council. Adolescent girls and young women's perceptions of oral pre-exposure  
23 prophylaxis introduction in Tanzania: findings from implementation science research".  
24 DREAMS Tanzania Results Brief 3. Washington, DC: Population Council, 2017.  
25  
26  
27  
28 39. Lees S, Scorgie F, Khoza N, et al. Understanding motives for initiating PrEP amongst  
29 adolescent girls and young women (AGYW) in South Africa and Tanzania. *AIDS* 2018.  
30 Amsterdam, the Netherlands, 2018.  
31  
32  
33  
34 40. Pilgrim N, Jani N, Mathur S, et al. Provider perspectives on PrEP for adolescent girls and  
35 young women in Tanzania: The role of provider biases and quality of care. *PLoS ONE*  
36 2018;13(4):e0196280.  
37  
38  
39  
40  
41 41. Belenky NM, Cole SR, Pence BW, Itemba D, Maro V, Whetten K. Depressive symptoms, HIV  
42 medication adherence, and HIV clinical outcomes in Tanzania: a prospective,  
43 observational study. *PLoS ONE* 2014;9(5):e95469.  
44  
45  
46  
47 42. Antelman G, Fawzi MCS, Kaaya S, et al. Predictors of HIV-1 serostatus disclosure: a  
48 prospective study among HIV-infected pregnant women in Dar es Salaam, Tanzania. *AIDS*  
49 2001;15(14):1865-74.  
50  
51  
52  
53 43. Tanzania Commission for AIDS (TACAIDS), Zanzibar AIDS Commission (ZAC), National  
54 Bureau of Statistics (NBS), Office of the Chief Government Statistician (OCGS), ICF  
55 International. Tanzania HIV/AIDS and Malaria Indicator Survey 2011-12. Dar es Salaam,  
56 Tanzania: TACAIDS, ZAC, NBS, OCGS, and ICF International, 2013.  
57  
58  
59  
60

- 1  
2  
3 44. Nunn AS, Brinkley-Rubinstein L, Oldenburg CE, et al. Defining the HIV pre-exposure  
4 prophylaxis care continuum. *AIDS (London, England)* 2017;31(5):731.  
5  
6  
7  
8 45. NIH Launches First Large Trial of a Long-Acting Injectable Drug for HIV Prevention: Study  
9 to Test Efficacy, Safety of Injectable Cabotegravir Compared to Daily Oral PrEP. 20 Dec  
10 2016 2016. [https://www.niaid.nih.gov/news-events/nih-launches-first-large-trial-long-](https://www.niaid.nih.gov/news-events/nih-launches-first-large-trial-long-acting-injectable-drug-hiv-prevention)  
11 [acting-injectable-drug-hiv-prevention](https://www.niaid.nih.gov/news-events/nih-launches-first-large-trial-long-acting-injectable-drug-hiv-prevention). (accessed 4 September 2017).  
12  
13  
14  
15  
16 46. National Bureau of Statistics, Office of Chief Government Statistician. 2012 Population and  
17 Housing Census: Population Distribution by Administrative Areas. Dar es Salaam:  
18 National Bureau of Statistics, 2013.  
19  
20  
21  
22  
23  
24  
25  
26  
27  
28  
29  
30  
31  
32  
33  
34  
35  
36  
37  
38  
39  
40  
41  
42  
43  
44  
45  
46  
47  
48  
49  
50  
51  
52  
53  
54  
55  
56  
57  
58  
59  
60

1  
2  
3 **Contributions:** DS and TWB conceptualized the study and contributed to the study design. GH  
4 contributed to study design, conducted the analyses, summarized the results in tables and  
5 figures and wrote the first draft of the paper. AM, KFO, IM, PD, NU and EM contributed  
6 substantially to data acquisition. DB and CEO contributed to the study design and  
7 interpretation. All authors contributed to the study design, data interpretation and revisions to  
8 the text, and approved the final text and agreed to be accountable for the work.  
9  
10  
11  
12  
13

14 **Acknowledgements:** We thank the Kinondoni District Medical Officer, bar owners, bar  
15 managers and barmaids for their assistance conducting this study.  
16  
17  
18

19 **Funding:** This study was supported by the National Institute on Aging (grant R01-AI112339).  
20 KFO was supported in part by the National Institute of Allergy and Infectious Disease T32-  
21 AI007535 (PI Seage). CEO was supported in part by the National Institute on Drug Abuse T32-  
22 DA013911 (PI Flanigan) and the National Institute of Mental Health R25-MH083620 (PI Nunn).  
23 TB was supported by the Alexander von Humboldt Foundation through the Alexander von  
24 Humboldt professor award, which is funded by the German Federal Ministry of Education and  
25 Research; the Wellcome Trust; the European Union, the European Commission; the Clinton  
26 Health Access Initiative; and the National Institutes of Health through the National Institute of  
27 Child Health and Human Development (R01-HD084233), the National Institute on Aging (P01-  
28 AG041710), the National Institute of Allergy and Infectious Diseases (R01-AI124389) and the  
29 Fogarty International Center (D43-TW009775).  
30  
31  
32  
33  
34  
35  
36  
37  
38

39 **Disclaimer:** The funders had no role in study design, data collection and analysis, decision to  
40 publish, or preparation of the manuscript.  
41  
42

43 **Patient consent:** Written informed consent was obtained from all individual participants  
44 included in the study.  
45  
46  
47

48 **Competing interests:** None declared  
49

50 **Data sharing statement:** All unpublished data related to this research project are available  
51 with the authors and can be requested by emailing to [g.harling@ucl.ac.uk](mailto:g.harling@ucl.ac.uk).  
52  
53  
54  
55  
56  
57  
58  
59  
60

## FIGURES AND TABLES

**Table 1: Descriptive statistics for socio-demographic and behavioral risk factors for HIV**

|                                                       | All respondents |               | PrEP question respondents |             |
|-------------------------------------------------------|-----------------|---------------|---------------------------|-------------|
|                                                       | N               |               | N                         |             |
| Age                                                   | 66              | 26 [23 - 30]  | 56                        | 25 [23-29]  |
| Born in Dar es Salaam                                 | 65              | 9%            | 55                        | 9%          |
| Years working in bars                                 | 66              | 2 [0.4 - 4]   | 56                        | 1.8 [0.4-3] |
| Plan to continue bar work                             | 66              | 11%           | 56                        | 9%          |
| Monthly income (USD)                                  | 62              | 91 [68 - 136] | 53                        | 91 [68-136] |
| Ever been pregnant                                    | 66              | 85%           | 56                        | 82%         |
| Of whom, ever had undesired pregnancy                 | 56              | 52%           | 46                        | 54%         |
| Of whom, ever had termination or miscarriage          | 56              | 46%           | 46                        | 46%         |
| Ever had sex with anyone for money                    | 66              | 50%           | 56                        | 54%         |
| Ever had sex with patron for money                    | 66              | 35%           | 56                        | 38%         |
| Of whom, ever had oral sex with patron                | 23              | 70%           | 21                        | 30%         |
| Of whom, Ever had vaginal sex with patron             | 23              | 48%           | 21                        | 67%         |
| Of whom, How often asks patron to use condom †        | 23              | 4 [3 - 4]     | 21                        | 4 [4-4]     |
| Of whom, How often patron asks not to use condom †    | 23              | 2 [1 - 3]     | 21                        | 3 [2-3]     |
| Ever had sex with others for money                    | 66              | 30%           | 21                        | 48%         |
| Number of non-client partners in past 12 months       | 56              | 2 [1 - 3]     | 47                        | 1 [1-3]     |
| Has a primary partner                                 | 66              | 68%           | 56                        | 66%         |
| Of whom, used condom at last sex with primary partner | 44              | 18%           | 37                        | 19%         |
| Currently using male condoms for family planning      | 66              | 36%           | 56                        | 38%         |
| PHQ-9 major depressive symptoms                       | 66              | 20%           | 56                        | 16%         |
| PTSD-IV screen positive                               | 66              | 21%           | 56                        | 23%         |
| Low social support                                    | 66              | 58%           | 56                        | 55%         |
| Ever taken an HIV test                                | 66              | 97%           | 56                        | 96%         |
| Number of HIV tests ever taken                        | 64              | 3 [2 - 5]     | 54                        | 3 [2-5]     |
| Months since last HIV test                            | 64              | 6 [3.5 - 12]  | 54                        | 6 [4-12]    |
| Willing to complete HCT today                         | 66              | 85%           | 56                        | 86%         |

Values are counts (N), proportions or medians and interquartile ranges. USD: United States dollar; PHQ: Patient Health Questionnaire; PTSD: Post-traumatic stress disorder; HCT: HIV counselling and testing. † 5-point scale; higher values indicate greater frequency.



**Table 2: Associations between socio-demographic and behavioral factors and interest in PrEP modalities**

|                                                               | Daily pill  |             | 90-day injectable |                | Vaginal gel  |             | Vaginal ring |            |
|---------------------------------------------------------------|-------------|-------------|-------------------|----------------|--------------|-------------|--------------|------------|
|                                                               | No          | Yes         | No                | Yes            | No           | Yes         | No           | Yes        |
| Very/somewhat interested in modality                          | 30          | 26          | 12                | 44             | 35           | 21          | 50           | 6          |
| Age                                                           | 25 [23-30]  | 25 [23-28]  | 23 [22-28.5]      | 25 [23-29]     | 25 [22-28]   | 25 [23-30]  | 25 [22-29]   | 27 [24-27] |
| Born in Dar es Salaam                                         | 8%          | 10%         | 8%                | 9%             | 9%           | 10%         | 8%           | 17%        |
| Years working in bars                                         | 1.8 [0.4-3] | 1.8 [0.3-3] | 1.5 [0.2-2.5]     | 1.8 [0.5-3]    | 1.5 [0.5-3]  | 2 [0.25-6]  | 1.5 [0.4-3]  | 2 [2-3]    |
| Plan to continue bar work                                     | 8%          | 11%         | 8%                | 10%            | 9%           | 10%         | 11%          | 0%         |
| Monthly income (USD)                                          | 91 [68-136] | 91 [57-148] | 91 [68-136]       | 91 [68-159]    | 102 [80-136] | 91 [55-182] | 91 [68-159]  | 91 [91-91] |
| Ever been pregnant                                            | 88%         | 77%         | 83%               | 82%            | 80%          | 86%         | 82%          | 83%        |
| Of whom, ever had undesired pregnancy                         | 48%         | 61%         | 50%               | 56%            | 64%          | 39%         | 56%          | 40%        |
| Of whom, ever had termination or miscarriage                  | <b>30%</b>  | <b>61%</b>  | 40%               | 47%            | 46%          | 44%         | 46%          | 40%        |
| Ever had sex with anyone for money                            | 46%         | 60%         | 50%               | 55%            | 54%          | 52%         | 56%          | 33%        |
| Ever had sex with patron for money                            | 31%         | 43%         | 25%               | 41%            | 40%          | 33%         | 38%          | 33%        |
| Of whom, ever had oral sex with patron                        | 27%         | 33%         | 33%               | 30%            | 31%          | 29%         | 34%          | 0%         |
| Of whom, Ever had vaginal sex with patron                     | 75%         | 62%         | 100%              | 61%            | 64%          | 71%         | 63%          | 100%       |
| Of whom, How often asks patron to use condom <sup>†</sup>     | 4 [4-4]     | 4 [3-4]     | 4 [4-4]           | 4 [3-4]        | 4 [2-4]      | 4 [4-4]     | 4 [4-4]      | 3.5 [3-4]  |
| Of whom, How often patron asks not to use condom <sup>†</sup> | 1.5 [1-2.5] | 2 [2-3]     | 2 [1-2]           | 2 [1-3]        | 2 [1-3]      | 2 [1-2]     | 2 [1-3]      | 2 [1-3]    |
| Ever had sex with others for money                            | 25%         | 62%         | 33%               | 50%            | 50%          | 43%         | 47%          | 50%        |
| Number of non-client partners in past 12m                     | 2 [1-3]     | 1 [1-3]     | <b>1 [1-1]</b>    | <b>2 [1-3]</b> | 2 [1-3]      | 1 [1-3]     | 1 [1-3]      | 1.5 [1-3]  |
| Has a primary partner                                         | 69%         | 63%         | 75%               | 64%            | 74%          | 52%         | 62%          | 100%       |
| Of whom, used condom at last sex with primary partner         | 11%         | 26%         | 11%               | 21%            | 12%          | 36%         | 16%          | 33%        |
| Currently using male condoms for family planning              | 40%         | 53%         | 40%               | 48%            | 38%          | 60%         | 43%          | 75%        |
| PHQ-9 major depressive symptoms                               | 15%         | 27%         | 8%                | 25%            | 17%          | 29%         | 24%          | 0%         |
| PTSD-IV screen positive                                       | 15%         | 30%         | 8%                | 27%            | 20%          | 29%         | 24%          | 17%        |
| Low social support                                            | 50%         | 60%         | 58%               | 55%            | 54%          | 57%         | 58%          | 33%        |
| Ever taken an HIV test                                        | 100%        | 93%         | 100%              | 95%            | 97%          | 95%         | 96%          | 100%       |
| Number of HIV tests ever taken                                | 3 [2-5]     | 3 [2-5]     | 3 [1.5-5.5]       | 3 [2-5]        | 3 [2-5]      | 3 [2-4]     | 3 [2-5]      | 3.5 [1-5]  |
| Months since last HIV test                                    | 5 [4-10]    | 7 [4-13.5]  | 5 [3.5-9]         | 7 [4-12]       | 6.5 [5-15]   | 5.5 [3.5-7] | 6 [4-12]     | 8.5 [4-11] |
| Willing to complete HCT today                                 | 25 [23-30]  | 25 [23-28]  | 23 [22-28.5]      | 25 [23-29]     | 25 [22-28]   | 25 [23-30]  | 25 [22-29]   | 27 [24-27] |

Values are counts (interest in modality row), proportions or medians and interquartile ranges. USD: United States dollar; FP: Family planning; HCT: HIV counselling and testing. <sup>†</sup> 5-point scale; higher values indicate greater frequency. The two significant differences (at  $\alpha=0.05$ ) between variables based on a  $\chi^2$  test for binary factors and Kruskal-Wallis tests for continuous and ordinal factors are shown in bold.



1  
2  
3 **Figure 1: Female bar worker interest in, and ordered preferences for, various**  
4 **PrEP modalities**  
5  
6  
7

8  
9 A. Level of interest in each PrEP modality; B. Ordered preference for each PrEP  
10 modality. Numbers in figures are percentages of all respondents. PrEP: Pre-exposure  
11 prophylaxis.  
12  
13  
14  
15  
16  
17  
18  
19  
20  
21  
22  
23  
24  
25  
26  
27  
28  
29  
30  
31  
32  
33  
34  
35  
36  
37  
38  
39  
40  
41  
42  
43  
44  
45  
46  
47  
48  
49  
50  
51  
52  
53  
54  
55  
56  
57  
58  
59  
60

For peer review only

1  
2  
3  
4  
5  
6  
7  
8  
9  
10  
11  
12  
13  
14  
15  
16  
17  
18  
19  
20  
21  
22  
23  
24  
25  
26  
27  
28  
29  
30  
31  
32  
33  
34  
35  
36  
37  
38  
39  
40  
41  
42  
43  
44  
45  
46  
47  
48  
49  
50  
51  
52  
53  
54  
55  
56  
57  
58  
59  
60



Female bar worker interest in, and ordered preferences for, various PrEP modalities

A. Level of interest in each PrEP modality; B. Ordered preference for each PrEP modality. Numbers in figures are percentages of all respondents. PrEP: Pre-exposure prophylaxis.

**Title:** HIV risk and Pre-exposure Prophylaxis interest among female bar workers in Dar es Salaam: a cross-sectional survey

## Supplementary Materials

### Supplementary Material 1: PrEP questionnaire section

A new method for preventing HIV is called pre-exposure prophylaxis, or PrEP. PrEP is for people who do not have HIV but who are at risk of getting it, to prevent HIV infection. Typically, PrEP is taken as a daily pill to prevent HIV infection

Prior to today, had you ever heard of pre-exposure prophylaxis (PrEP), or a daily pill to prevent HIV infection?

- Yes
- No
- Don't know/not sure
- Prefer not to answer

How interested are you in taking daily PrEP to prevent HIV infection?

- Very interested
- Somewhat interested
- Neutral
- Somewhat uninterested
- Very uninterested
- Don't know
- Prefer not to answer

One version of PrEP is a daily pill taken by mouth; PrEP is most effective when taken every single day. How difficult do you think it would be to take PrEP every single day?

- Very difficult
- Somewhat difficult
- Neither difficult nor easy
- Somewhat easy
- Very easy
- I don't know
- Prefer not to answer

What are some reasons it may be difficult to take daily oral PrEP every single day?

- Difficulty remembering
- Travel/migration
- Alcohol/drug use
- Fear that my spouse/other non-commercial partner might find out
- Fear that other sex workers might find out
- Fear that my clients might find out
- Fear that other people might find out
- Prefer not to answer

If you were to get PrEP, where would you prefer to get PrEP?

- Public facility
- Private facility
- Drug store/pharmacy
- Peer educator
- Other: \_\_\_\_\_
- Prefer not to answer

1  
2  
3 Another form of PrEP that is being tested is an injection, or a shot, every 3 months – instead of a  
4 pill by mouth every day.  
5

6 If found to be effective, how interested would you be in taking injectable PrEP?  
7

- 8
- 9 • Very interested
  - 10 • Somewhat interested
  - 11 • Neutral
  - 12 • Somewhat uninterested
  - 13 • Very uninterested
  - 14 • Don't know
  - 15 • Prefer not to answer

16 How difficult do you think it would be to return for an injection every 3 months?  
17

- 18
- 19 • Very difficult
  - 20 • Somewhat difficult
  - 21 • Neither difficult nor easy
  - 22 • Somewhat easy
  - 23 • Very easy
  - 24 • Don't know
  - 25 • Prefer not to answer

26 A third form of PrEP that is being tested is a gel (like a lubricant) that you insert into your  
27 vagina.  
28

29 If found to be effective, how interested would you be in taking PrEP as a vaginal gel?  
30

- 31
- 32 • Very interested
  - 33 • Somewhat interested
  - 34 • Neutral
  - 35 • Somewhat uninterested
  - 36 • Very uninterested
  - 37 • Don't know
  - 38 • Prefer not to answer

39 How difficult do you think it would be to apply the gel before sex?  
40

- 41
- 42 • Very difficult
  - 43 • Somewhat difficult
  - 44 • Neither difficult nor easy
  - 45 • Somewhat easy
  - 46 • Very easy
  - 47 • Don't know
  - 48 • Prefer not to answer

49 A fourth form of PrEP that is being tested is a vaginal ring that you insert into your vagina once  
50 per month.  
51

52 If found to be effective, how interested would you be in taking PrEP as a vaginal ring?  
53

- 54
- 55 • Very interested
  - 56 • Somewhat interested
  - 57 • Neutral
  - 58 • Somewhat uninterested
  - 59 • Very uninterested
  - 60 • Don't know
  - 61 • Prefer not to answer

52 How difficult do you think it would be to remember to replace the ring each month?  
53

- 54
- 55 • Very difficult
  - 56 • Somewhat difficult
  - 57 • Neither difficult nor easy
  - 58 • Somewhat easy
  - 59 • Very easy
  - 60 • Don't know
  - 61 • Prefer not to answer

1  
2  
3 Of the four ways of taking PrEP, please tell me which you prefer the most and which the least?  
4 (Enter a 1 for the MOST preferred, and a 4 for the LEAST preferred method.)  
5

- 6 \_\_\_ A daily oral pill  
7 \_\_\_ Quarterly (every 3 months) injection/shot  
8 \_\_\_ A gel (like a lubricant) that you insert into your vagina  
9 \_\_\_ A ring that you insert into your vagina  
10  
11  
12  
13  
14  
15  
16  
17  
18  
19  
20  
21  
22  
23  
24  
25  
26  
27  
28  
29  
30  
31  
32  
33  
34  
35  
36  
37  
38  
39  
40  
41  
42  
43  
44  
45  
46  
47  
48  
49  
50  
51  
52  
53  
54  
55  
56  
57  
58  
59  
60

For peer review only

**STROBE 2007 (v4) Statement—Checklist of items that should be included in reports of *cross-sectional studies***

| Section/Topic             | Item # | Recommendation                                                                                                                                                                       | Reported on page # |
|---------------------------|--------|--------------------------------------------------------------------------------------------------------------------------------------------------------------------------------------|--------------------|
| <b>Title and abstract</b> | 1      | (a) Indicate the study’s design with a commonly used term in the title or the abstract                                                                                               | 1                  |
|                           |        | (b) Provide in the abstract an informative and balanced summary of what was done and what was found                                                                                  | 2                  |
| <b>Introduction</b>       |        |                                                                                                                                                                                      |                    |
| Background/rationale      | 2      | Explain the scientific background and rationale for the investigation being reported                                                                                                 | 5-6                |
| Objectives                | 3      | State specific objectives, including any prespecified hypotheses                                                                                                                     | 6                  |
| <b>Methods</b>            |        |                                                                                                                                                                                      |                    |
| Study design              | 4      | Present key elements of study design early in the paper                                                                                                                              | 6-7                |
| Setting                   | 5      | Describe the setting, locations, and relevant dates, including periods of recruitment, exposure, follow-up, and data collection                                                      | 6-7                |
| Participants              | 6      | (a) Give the eligibility criteria, and the sources and methods of selection of participants                                                                                          | 7                  |
| Variables                 | 7      | Clearly define all outcomes, exposures, predictors, potential confounders, and effect modifiers. Give diagnostic criteria, if applicable                                             | 7                  |
| Data sources/ measurement | 8*     | For each variable of interest, give sources of data and details of methods of assessment (measurement). Describe comparability of assessment methods if there is more than one group | 7                  |
| Bias                      | 9      | Describe any efforts to address potential sources of bias                                                                                                                            | 7                  |
| Study size                | 10     | Explain how the study size was arrived at                                                                                                                                            | 7                  |
| Quantitative variables    | 11     | Explain how quantitative variables were handled in the analyses. If applicable, describe which groupings were chosen and why                                                         | 7                  |
| Statistical methods       | 12     | (a) Describe all statistical methods, including those used to control for confounding                                                                                                | 7                  |
|                           |        | (b) Describe any methods used to examine subgroups and interactions                                                                                                                  | 7                  |
|                           |        | (c) Explain how missing data were addressed                                                                                                                                          | n/a                |
|                           |        | (d) If applicable, describe analytical methods taking account of sampling strategy                                                                                                   | n/a                |
|                           |        | (e) Describe any sensitivity analyses                                                                                                                                                | n/a                |
| <b>Results</b>            |        |                                                                                                                                                                                      |                    |

|                          |     |                                                                                                                                                                                                              |             |
|--------------------------|-----|--------------------------------------------------------------------------------------------------------------------------------------------------------------------------------------------------------------|-------------|
| Participants             | 13* | (a) Report numbers of individuals at each stage of study—eg numbers potentially eligible, examined for eligibility, confirmed eligible, included in the study, completing follow-up, and analysed            | 8           |
|                          |     | (b) Give reasons for non-participation at each stage                                                                                                                                                         | n/a         |
|                          |     | (c) Consider use of a flow diagram                                                                                                                                                                           | n/a         |
| Descriptive data         | 14* | (a) Give characteristics of study participants (eg demographic, clinical, social) and information on exposures and potential confounders                                                                     | 8 & Table 1 |
|                          |     | (b) Indicate number of participants with missing data for each variable of interest                                                                                                                          | Table 1     |
| Outcome data             | 15* | Report numbers of outcome events or summary measures                                                                                                                                                         | 8-9         |
| Main results             | 16  | (a) Give unadjusted estimates and, if applicable, confounder-adjusted estimates and their precision (eg, 95% confidence interval). Make clear which confounders were adjusted for and why they were included | 9-10        |
|                          |     | (b) Report category boundaries when continuous variables were categorized                                                                                                                                    | n/a         |
|                          |     | (c) If relevant, consider translating estimates of relative risk into absolute risk for a meaningful time period                                                                                             | n/a         |
| Other analyses           | 17  | Report other analyses done—eg analyses of subgroups and interactions, and sensitivity analyses                                                                                                               | n/a         |
| <b>Discussion</b>        |     |                                                                                                                                                                                                              |             |
| Key results              | 18  | Summarise key results with reference to study objectives                                                                                                                                                     | 10-11       |
| Limitations              | 19  | Discuss limitations of the study, taking into account sources of potential bias or imprecision. Discuss both direction and magnitude of any potential bias                                                   | 11          |
| Interpretation           | 20  | Give a cautious overall interpretation of results considering objectives, limitations, multiplicity of analyses, results from similar studies, and other relevant evidence                                   | 11          |
| Generalisability         | 21  | Discuss the generalisability (external validity) of the study results                                                                                                                                        | 11          |
| <b>Other information</b> |     |                                                                                                                                                                                                              |             |
| Funding                  | 22  | Give the source of funding and the role of the funders for the present study and, if applicable, for the original study on which the present article is based                                                | 16          |

\*Give information separately for cases and controls in case-control studies and, if applicable, for exposed and unexposed groups in cohort and cross-sectional studies.

**Note:** An Explanation and Elaboration article discusses each checklist item and gives methodological background and published examples of transparent reporting. The STROBE checklist is best used in conjunction with this article (freely available on the Web sites of PLoS Medicine at <http://www.plosmedicine.org/>, Annals of Internal Medicine at <http://www.annals.org/>, and Epidemiology at <http://www.epidem.com/>). Information on the STROBE Initiative is available at [www.strobe-statement.org](http://www.strobe-statement.org).
