# Supplementary material for: HIV risk and pre-exposure prophylaxis interest among female bar workers in Dar es Salaam: cross-sectional survey
Source: PubMed Central journal article supplement — BMJ Open. 2019 Mar 20;9(3):e023272. doi: 10.1136/bmjopen-2018-023272 (PMC6475445; doi:10.1136/bmjopen-2018-023272), 2019-03-20
Supplement: bmjopen-2018-023272supp001.pdf [file bmjopen-2018-023272supp001.pdf]

**Title:** HIV risk and Pre-exposure Prophylaxis interest among female bar workers in Dar es Salaam: a cross-sectional survey

## Supplementary Materials

### Supplementary Material 1: PrEP questionnaire section

A new method for preventing HIV is called pre-exposure prophylaxis, or PrEP. PrEP is for people who do not have HIV but who are at risk of getting it, to prevent HIV infection. Typically, PrEP is taken as a daily pill to prevent HIV infection

Prior to today, had you ever heard of pre-exposure prophylaxis (PrEP), or a daily pill to prevent HIV infection?

- Yes
- No
- Don't know/not sure
- Prefer not to answer

How interested are you in taking daily PrEP to prevent HIV infection?

- Very interested
- Somewhat interested
- Neutral
- Somewhat uninterested
- Very uninterested
- Don't know
- Prefer not to answer

One version of PrEP is a daily pill taken by mouth; PrEP is most effective when taken every single day. How difficult do you think it would be to take PrEP every single day?

- Very difficult
- Somewhat difficult
- Neither difficult nor easy
- Somewhat easy
- Very easy
- I don't know
- Prefer not to answer

What are some reasons it may be difficult to take daily oral PrEP every single day?

- Difficulty remembering
- Travel/migration
- Alcohol/drug use
- Fear that my spouse/other non-commercial partner might find out
- Fear that other sex workers might find out
- Fear that my clients might find out
- Fear that other people might find out
- Prefer not to answer

If you were to get PrEP, where would you prefer to get PrEP?

- Public facility
- Private facility
- Drug store/pharmacy
- Peer educator
- Other: \_\_\_\_\_
- Prefer not to answer

Another form of PrEP that is being tested is an injection, or a shot, every 3 months – instead of a pill by mouth every day.

If found to be effective, how interested would you be in taking injectable PrEP?

- Very interested
- Somewhat interested
- Neutral
- Somewhat uninterested
- Very uninterested
- Don't know
- Prefer not to answer

How difficult do you think it would be to return for an injection every 3 months?

- Very difficult
- Somewhat difficult
- Neither difficult nor easy
- Somewhat easy
- Very easy
- Don't know
- Prefer not to answer

A third form of PrEP that is being tested is a gel (like a lubricant) that you insert into your vagina.

If found to be effective, how interested would you be in taking PrEP as a vaginal gel?

- Very interested
- Somewhat interested
- Neutral
- Somewhat uninterested
- Very uninterested
- Don't know
- Prefer not to answer

How difficult do you think it would be to apply the gel before sex?

- Very difficult
- Somewhat difficult
- Neither difficult nor easy
- Somewhat easy
- Very easy
- Don't know
- Prefer not to answer

A fourth form of PrEP that is being tested is a vaginal ring that you insert into your vagina once per month.

If found to be effective, how interested would you be in taking PrEP as a vaginal ring?

- Very interested
- Somewhat interested
- Neutral
- Somewhat uninterested
- Very uninterested
- Don't know
- Prefer not to answer

How difficult do you think it would be to remember to replace the ring each month?

- Very difficult
- Somewhat difficult
- Neither difficult nor easy
- Somewhat easy
- Very easy
- Don't know
- Prefer not to answer

Of the four ways of taking PrEP, please tell me which you prefer the most and which the least?  
(Enter a 1 for the MOST preferred, and a 4 for the LEAST preferred method.)

- A daily oral pill
- Quarterly (every 3 months) injection/shot
- A gel (like a lubricant) that you insert into your vagina
- A ring that you insert into your vagina
